# Supplementary material for: C-Locked Analogs of the Antimicrobial Peptide BP214
Source: MDPI journal article supplement (doi:10.3390/antibiotics11081080), 2022-08-09

# C-locked analogs of the antimicrobial peptide BP214

Ida Kristine Lysgaard Andersen <sup>1,2</sup>, Thomas T. Thomsen <sup>3,4,5</sup>, Jasmina Rashid<sup>1</sup>, Thomas Rønnemos Bobak<sup>1</sup>, Alberto Oddo<sup>1,6</sup>, Henrik Franzyk<sup>1</sup>, Anders Løbner-Olesen <sup>4</sup> and Paul R. Hansen<sup>1,\*</sup>

<sup>1</sup> Department of Drug Design and Pharmacology, Faculty of Health and Medical Sciences, University of Copenhagen, Universitetsparken 2, 2100 Copenhagen, Denmark;

<sup>2</sup> Present Address: Department of Agroecology, University of Aarhus, Forsøgsvej 1, 4200 Slagelse, Denmark. ida.andersen@agro.au.dk.

<sup>3</sup> Department of Clinical Microbiology, Rigshospitalet, Henrik Harpestrengs Vej 4A, 2100 Copenhagen. Denmark

<sup>4</sup> Department of Biology, Section for functional Genomics, University of Copenhagen, Ole Maaløes Vej 5, 2200 Copenhagen, Denmark; lobner@bio.ku.dk

<sup>5</sup> Present Address: Sniper Biome, Lersø Parkallé 44, 2100 Copenhagen, Denmark. tt@sniprbiome.com

<sup>6</sup> Present Address: Novozymes; albi.oddo@gmail.com

## Table of Contents:

**SI: Structure of BP214 analogues**

**SII: Overview of the analytical data obtained by MALDI-TOF-MS and RP-HPLC**

**SIII: Analytical chromatograms after purification**

**SIV: MALDI-TOF-MS spectra of all purified peptides**

**SV: Hemolysis dose response curves for BP214, [C4]BP214 and [(C10)C4]BP214.**

### SI: Structure of BP214 analogs

R (in blue) below represents the following fatty acids:

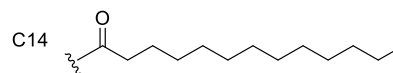

### Compounds 1-6:

**[C<sub>4</sub>]BP214 (2), [C<sub>6</sub>]BP214 (3), and [C<sub>8</sub>]BP214 (4), [C<sub>10</sub>]BP214 (5), [C<sub>12</sub>]BP214 (6), and [C<sub>14</sub>]BP214 (7).**

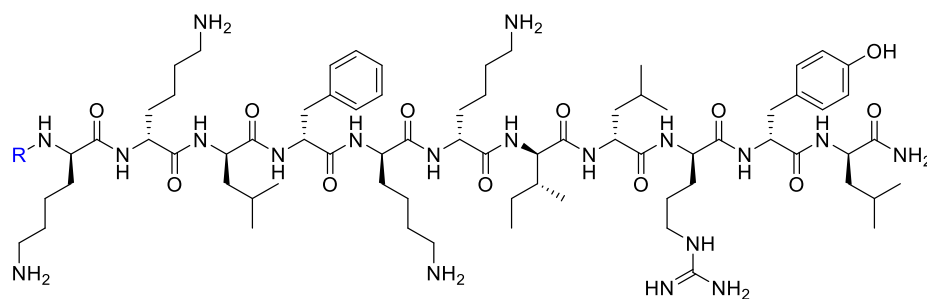

**[C3]BP214 (7)**

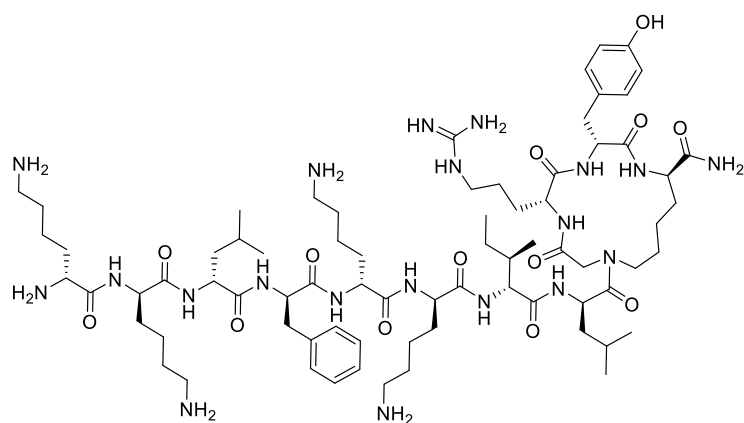

**[C4]BP214 (8)**

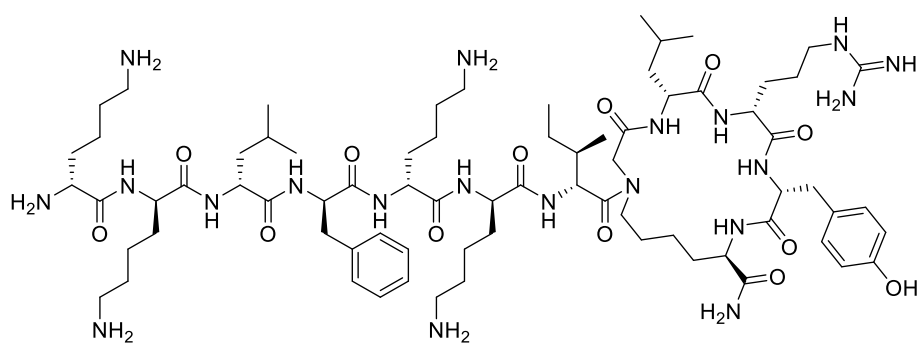

**[C5]BP214 (9)**

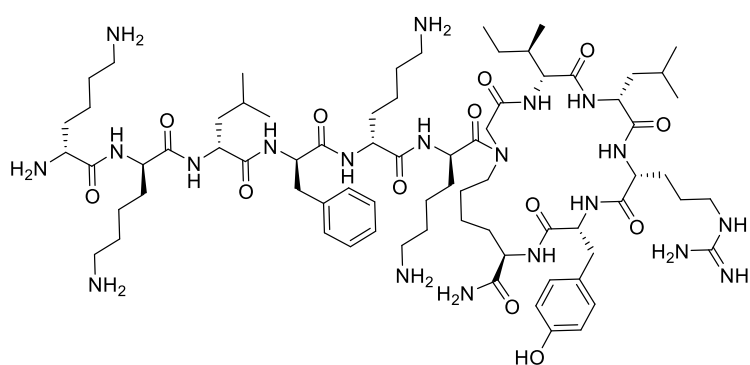

**[(C<sub>10</sub>)C3]BP214 (10), [(C<sub>12</sub>)C3]BP214 (11), and [(C<sub>14</sub>)C3]BP214 (12)**

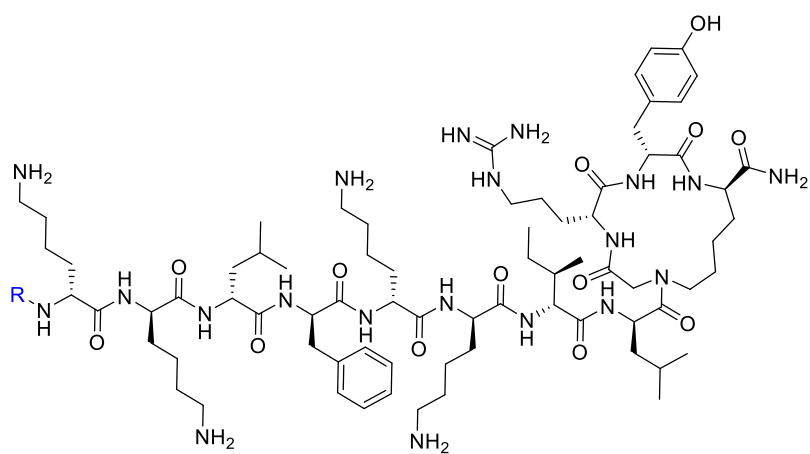

**[(C<sub>10</sub>)C4]BP214 (13), [(C<sub>12</sub>)C4]BP214 (14), and [(C<sub>14</sub>)C4]BP214 (15).**

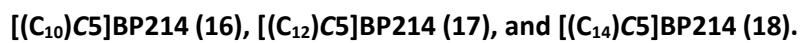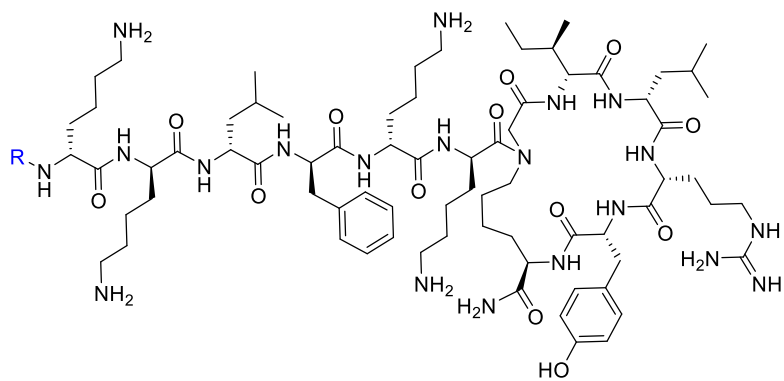

## SII: Schematic overview of the synthesised BP214 analogs

| Peptide name                             | Theoretical Mw (Da) | Yield (mg) | %B*  | Purity (%) |
|------------------------------------------|---------------------|------------|------|------------|
| BP214                                    | 1448.91             | 42.1       | 50.8 | 100.0      |
| [C <sub>4</sub> ]BP214                   | 1519.00             | 9.3        | 63.0 | 98.5       |
| [C <sub>6</sub> ]BP214                   | 1547.06             | 5.9        | 67.9 | 99.9       |
| [C <sub>8</sub> ]BP214                   | 1575.11             | 14.0       | 64.1 | 95.4       |
| [C <sub>10</sub> ]BP214                  | 1603.17             | 27.6       | 85.0 | 98.1       |
| [C <sub>12</sub> ]BP214                  | 1631.22             | 31.0       | 90.5 | 98.5       |
| [C <sub>14</sub> ]BP214                  | 1659.27             | 24.5       | 96.5 | 95.3       |
| [C <sub>3</sub> ]BP214                   | 1503.95             | 2.2        | 44.1 | 99.7       |
| [C <sub>4</sub> ]BP214                   | 1503.95             | 14.5       | 44.8 | 100.0      |
| [C <sub>5</sub> ]BP214                   | 1503.95             | 6.5        | 46.6 | 99.5       |
| [(C <sub>10</sub> )C <sub>3</sub> ]BP214 | 1658.20             | 4.1        | 62.7 | 93.0       |
| [(C <sub>12</sub> )C <sub>3</sub> ]BP214 | 1686.26             | 6.2        | 66.2 | 99.4       |
| [(C <sub>14</sub> )C <sub>3</sub> ]BP214 | 1714.31             | 4.4        | 70.0 | 96.6       |
| [(C <sub>10</sub> )C <sub>4</sub> ]BP214 | 1658.20             | 16.1       | 60.9 | 97.8       |
| [(C <sub>12</sub> )C <sub>4</sub> ]BP214 | 1686.26             | 23.1       | 65.1 | 98.1       |
| [(C <sub>14</sub> )C <sub>4</sub> ]BP214 | 1714.31             | 22.5       | 78.5 | 99.5       |
| [(C <sub>10</sub> )C <sub>5</sub> ]BP214 | 1658.20             | 9.3        | 61.3 | 97.8       |
| [(C <sub>12</sub> )C <sub>5</sub> ]BP214 | 1686.26             | 15.1       | 65.5 | 93.9       |
| [(C <sub>14</sub> )C <sub>5</sub> ]BP214 | 1714.31             | 17.2       | 78.5 | 99.5       |

\*Hydrophobicity as indicated by the percentage of mobile phase B (%B) at the peak elution time on analytical reversed-phase HPLC.

### SIII:Analytical HPLC chromatograms after purification

BP214

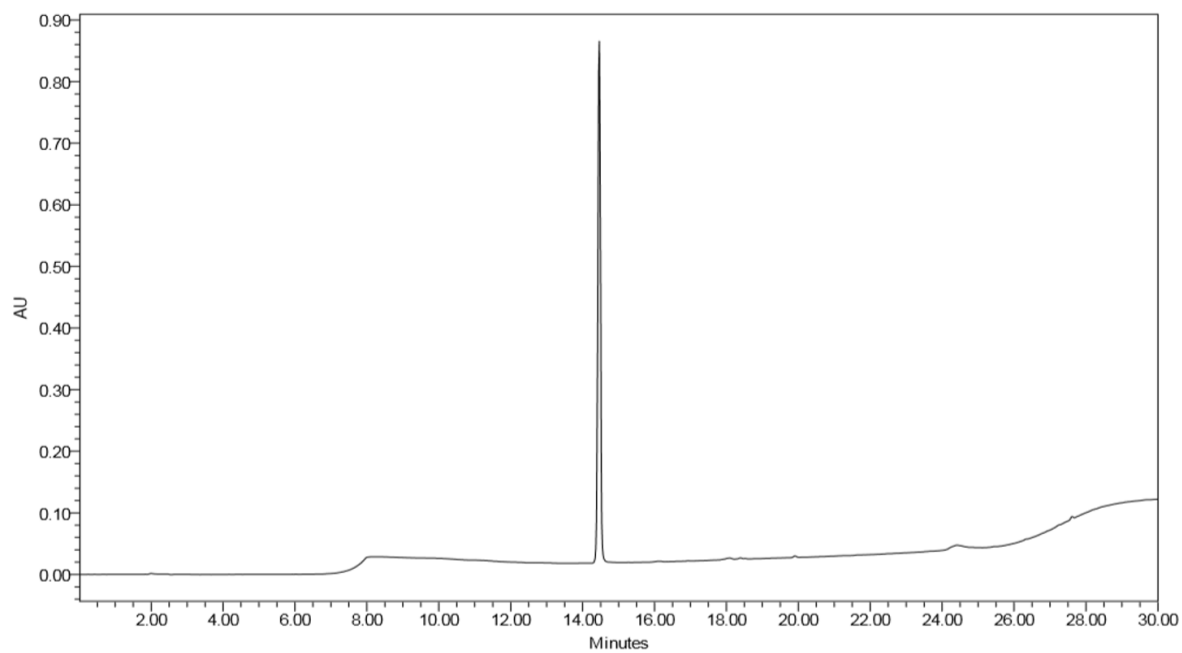

[C4]BP214 (1)

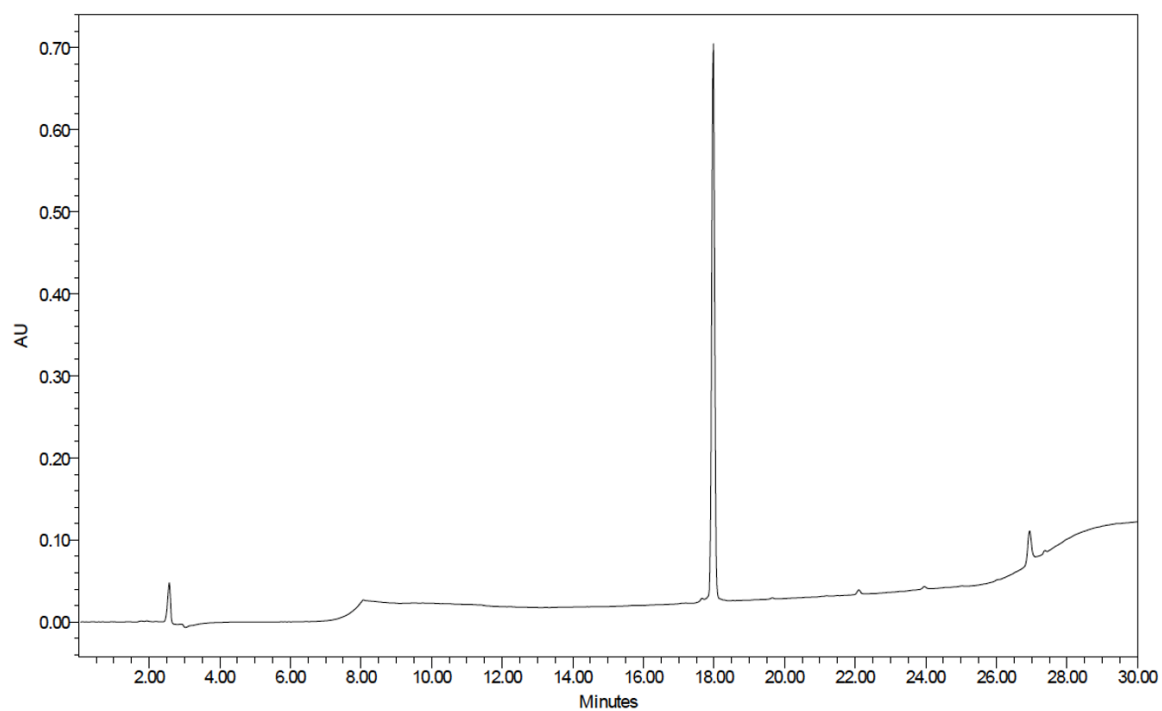

[C6]BP214 (2)

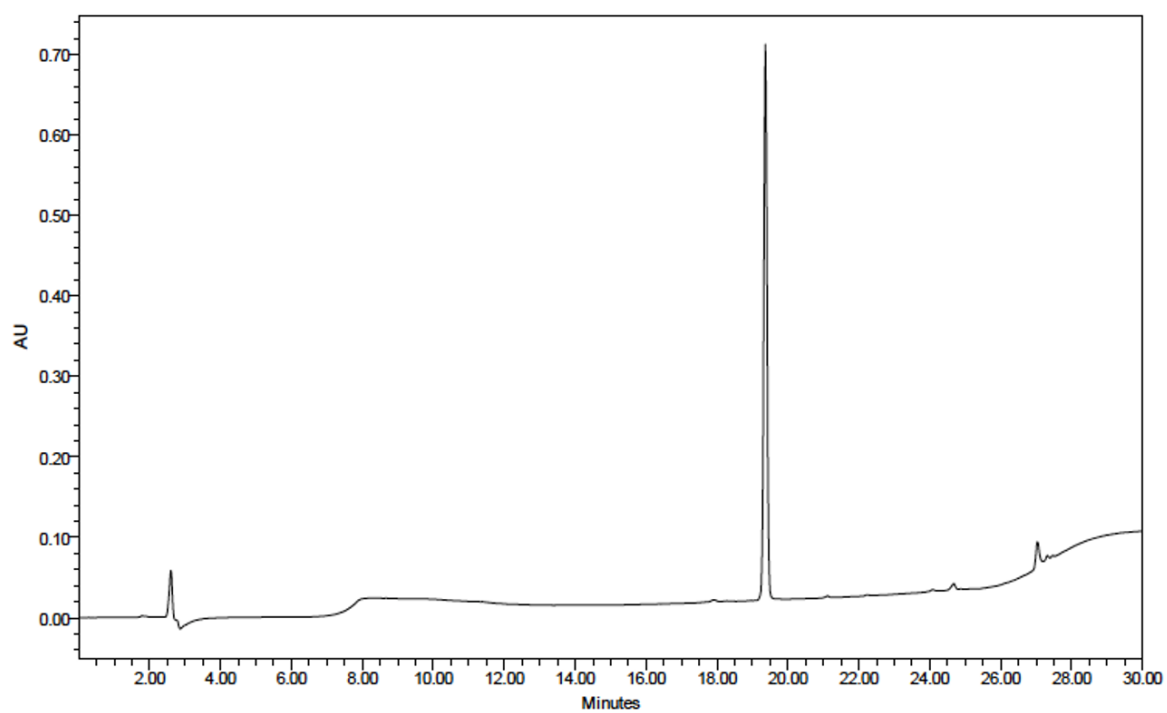

[C8]BP214 (3)

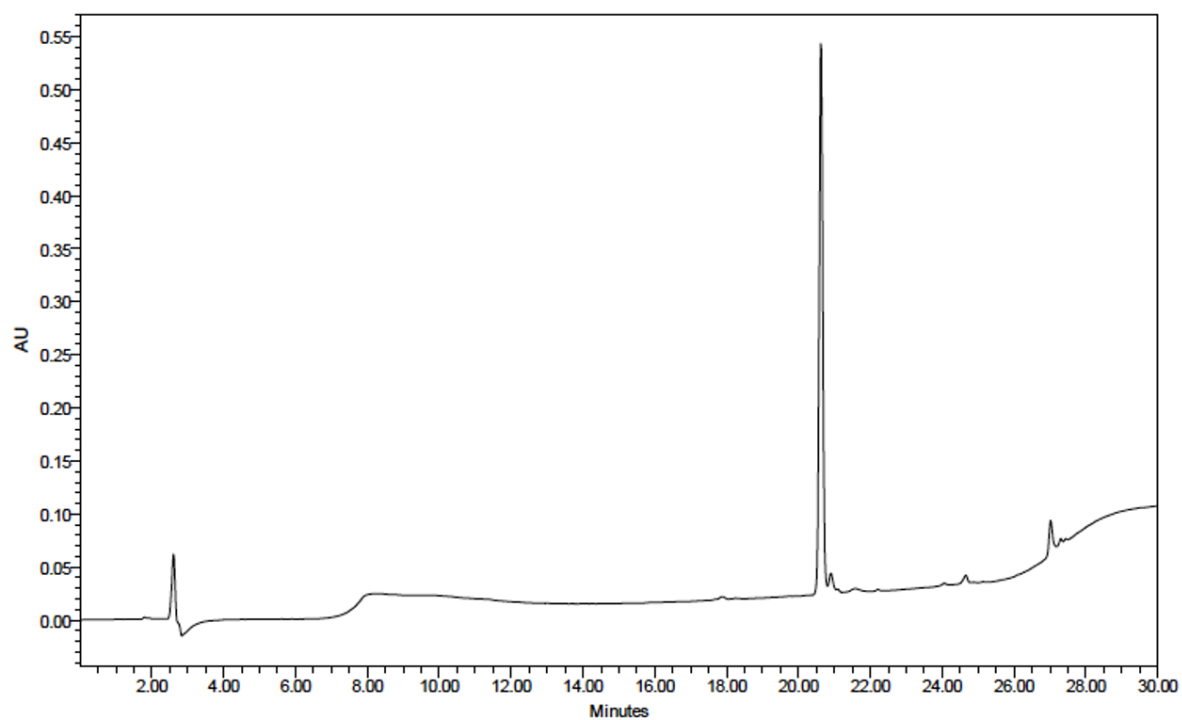

[C10]BP214 (4)

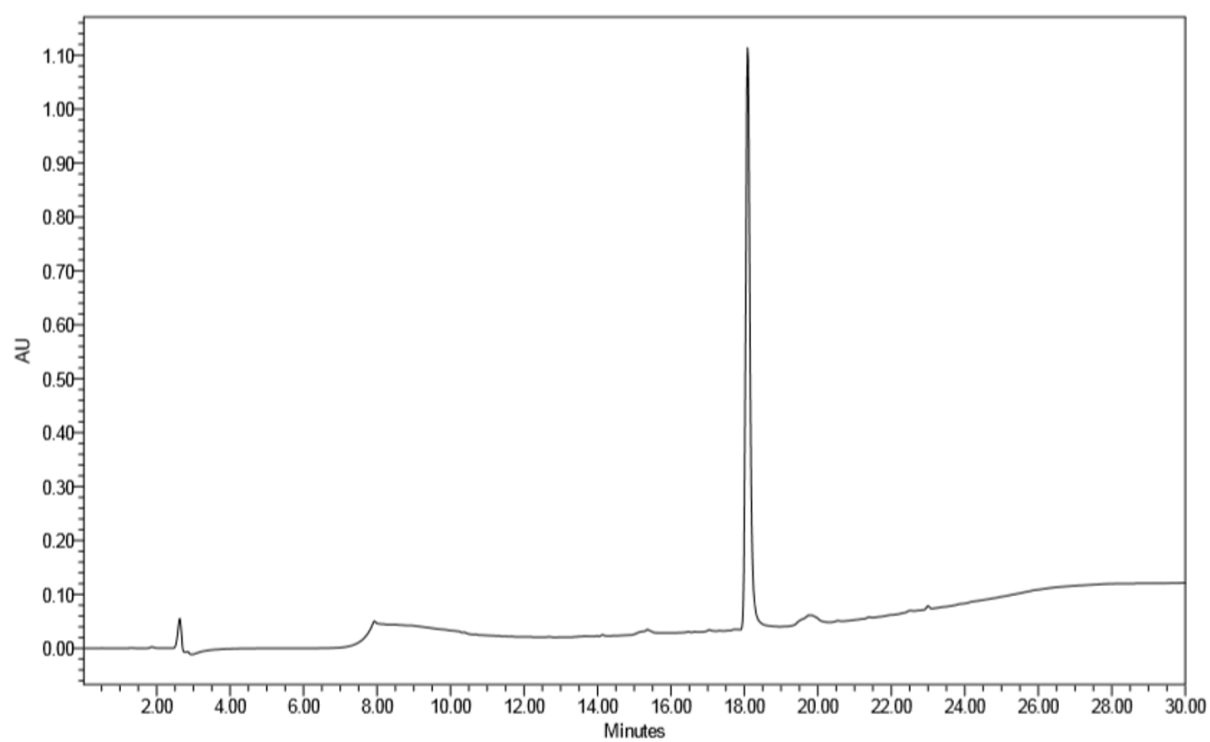

[C12]BP214 (5)

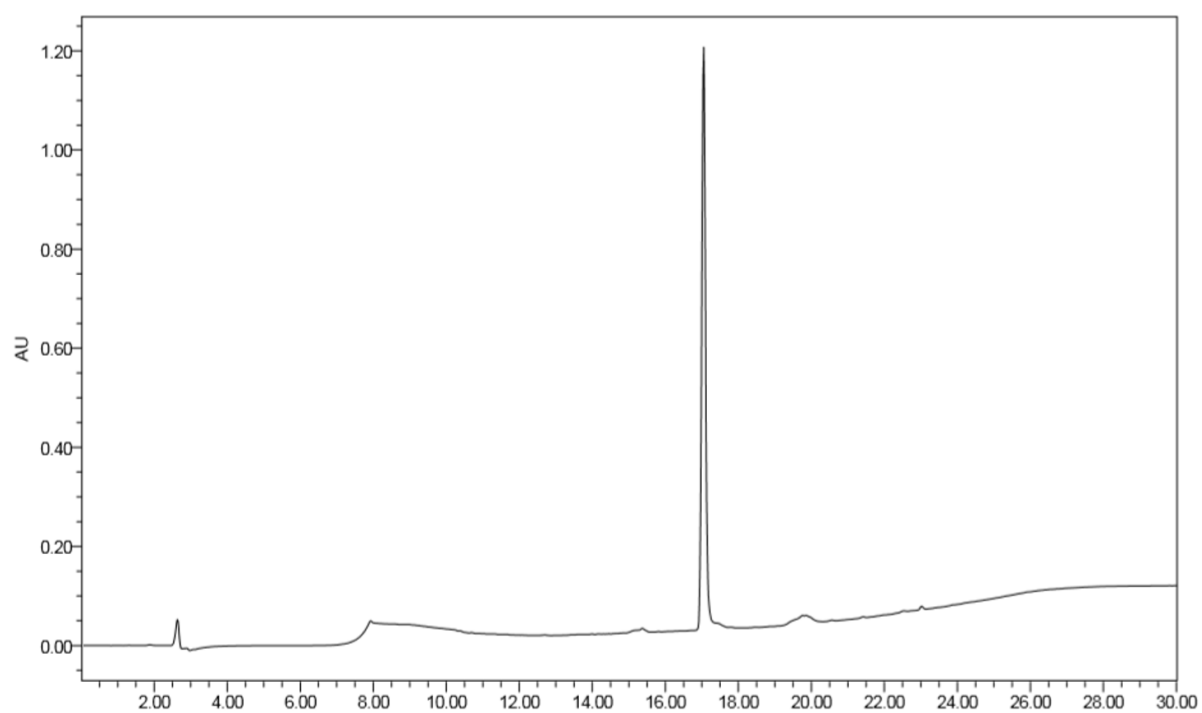



[C14]BP214 (6)

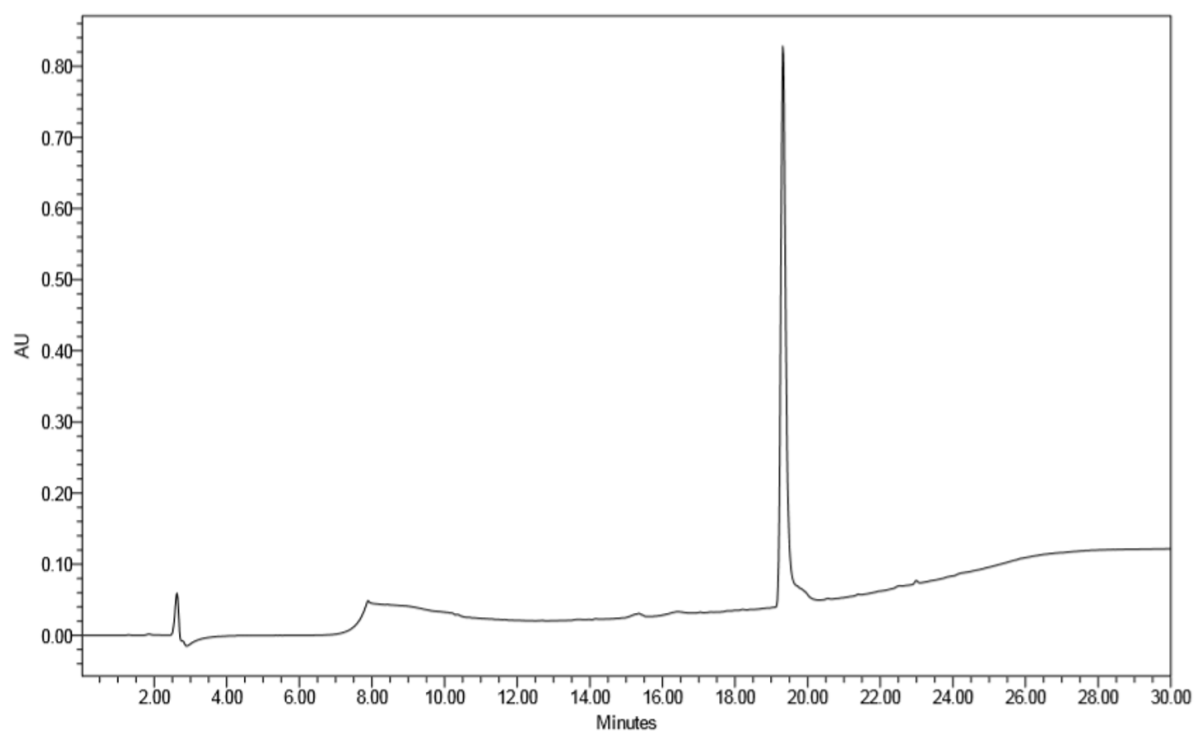

[C3]BP214 (7)

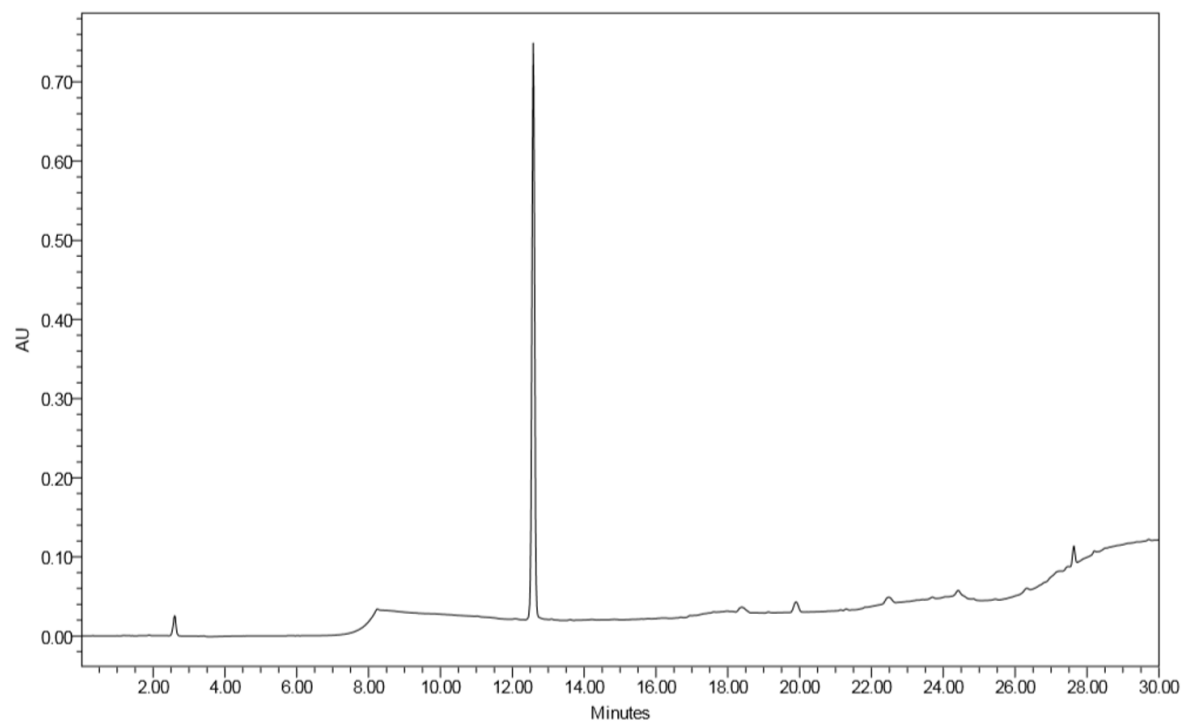

**[C4]BP214 (8)**

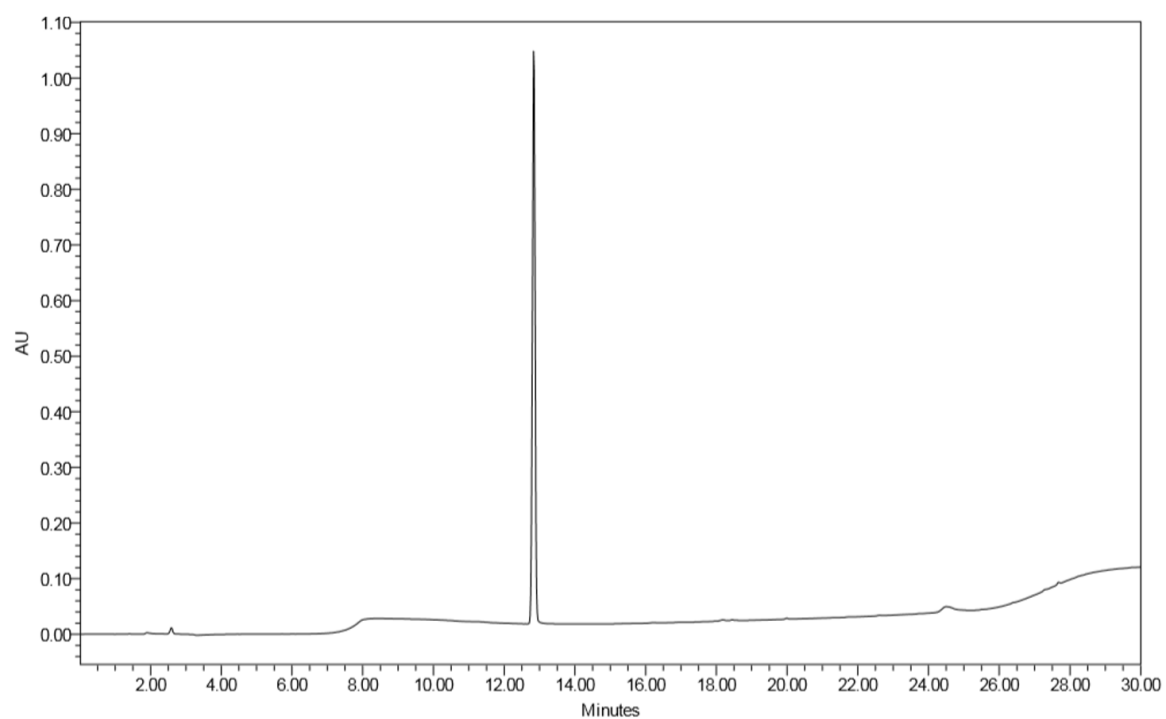

**[C5]BP214 (9)**

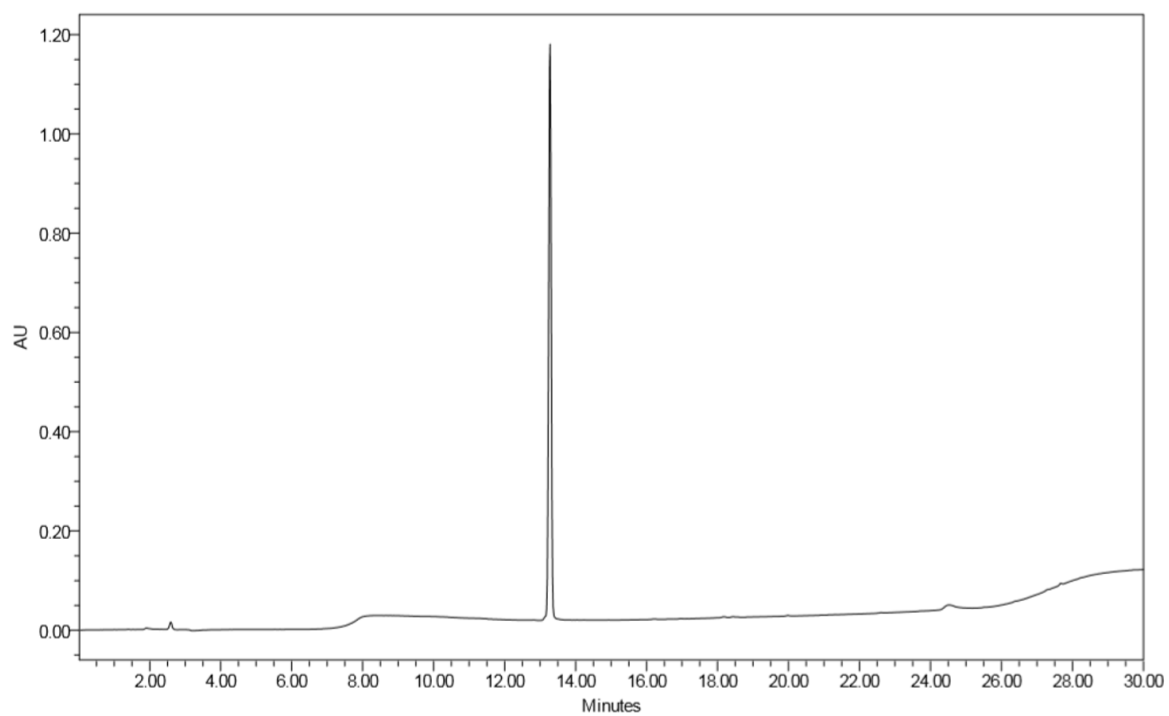

**[(C<sub>10</sub>)C3]BP214 (10)**

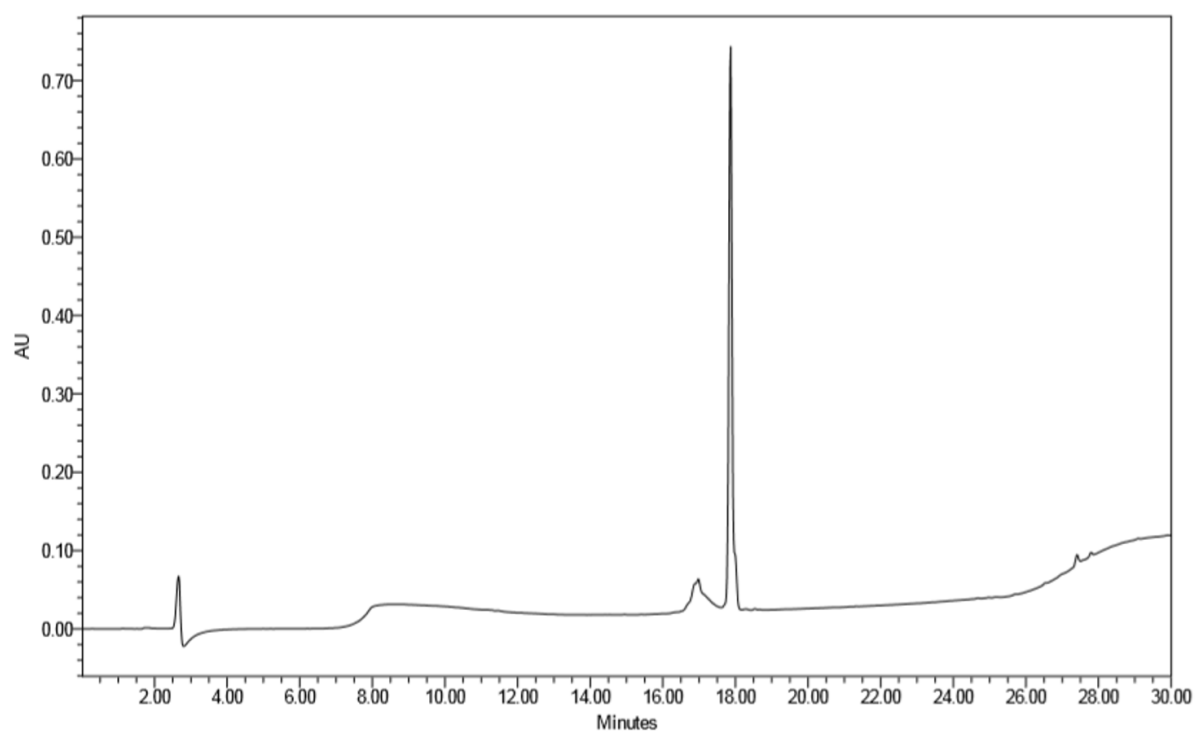

**[(C<sub>12</sub>)C3]BP214 (11)**

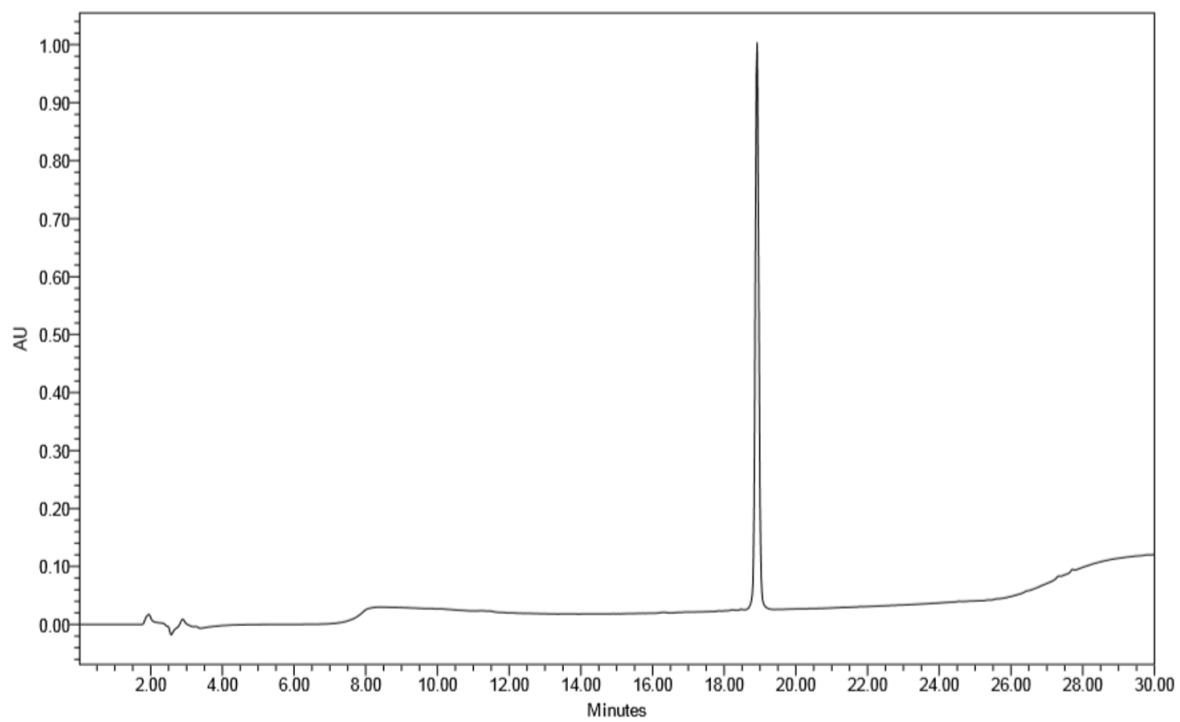

**[(C<sub>14</sub>)C3]BP214 (12)**

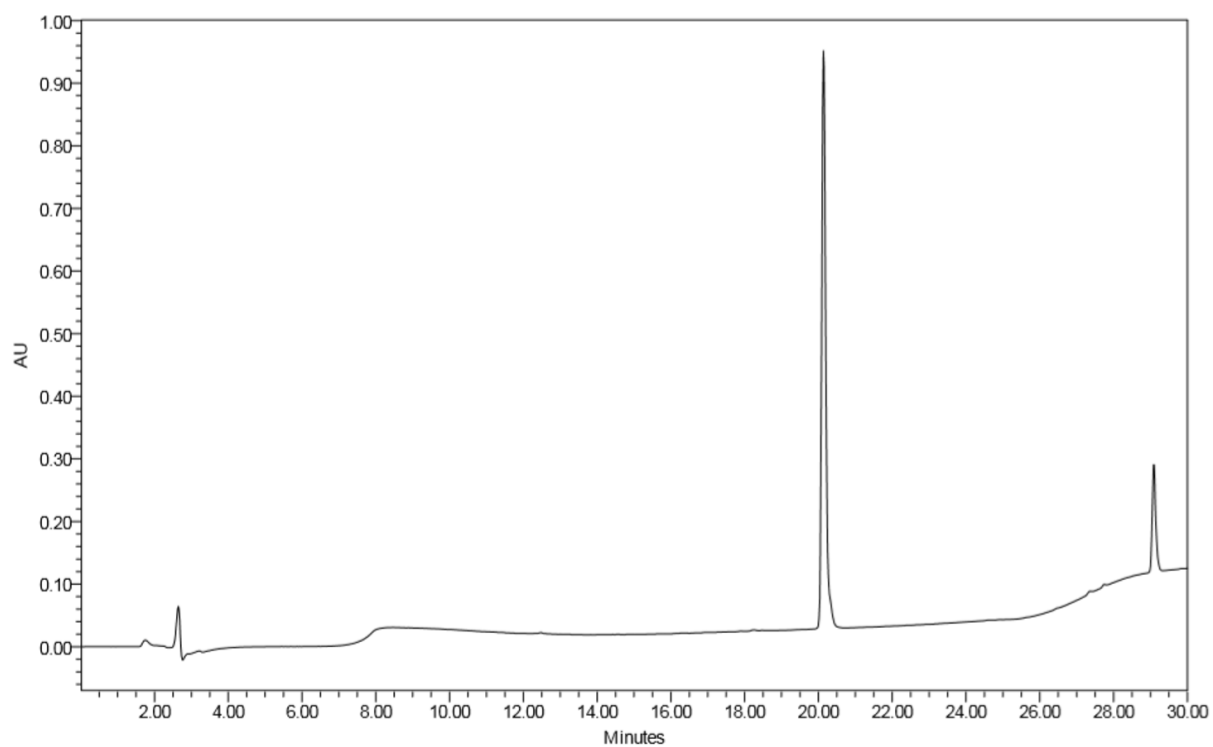

**[(C<sub>10</sub>)C4]BP214 (13)**

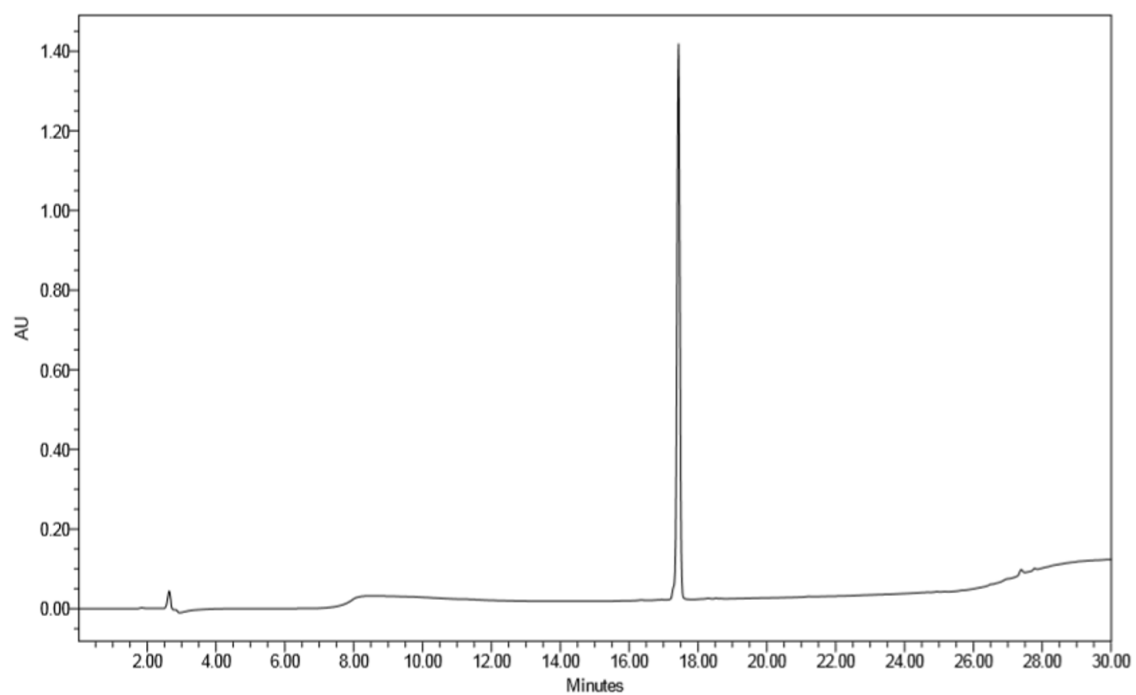

**[(C<sub>12</sub>)C<sub>4</sub>]BP214 (14)**

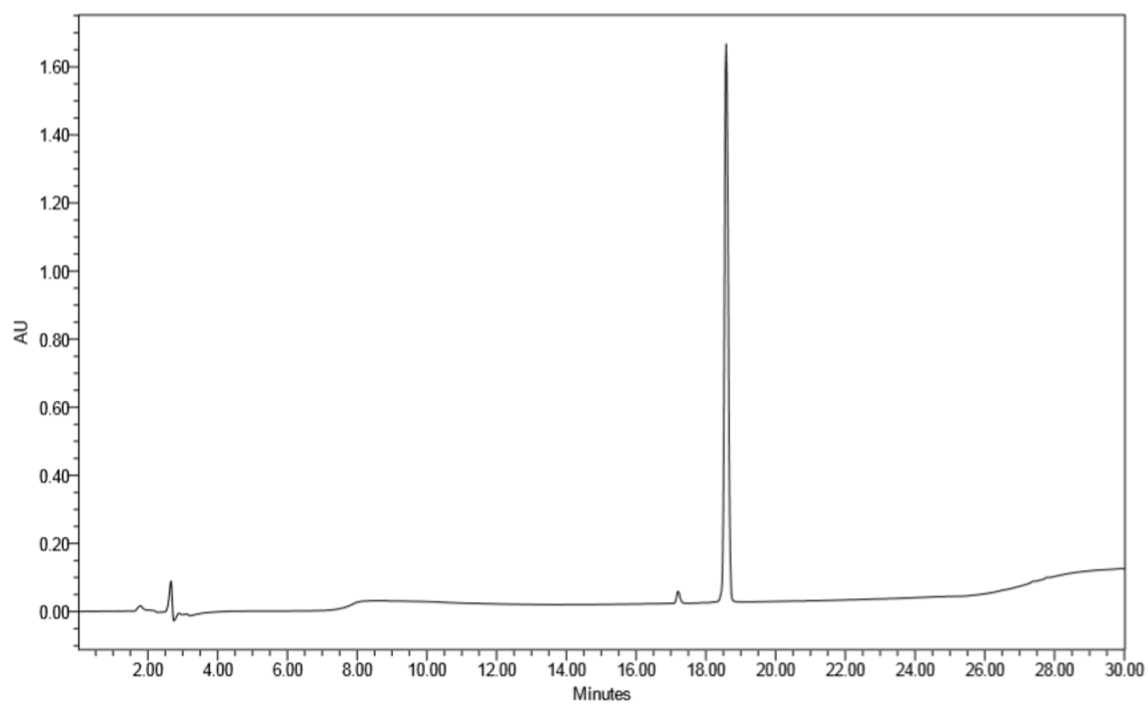

**[(C<sub>14</sub>)C<sub>4</sub>]BP214 (15)**

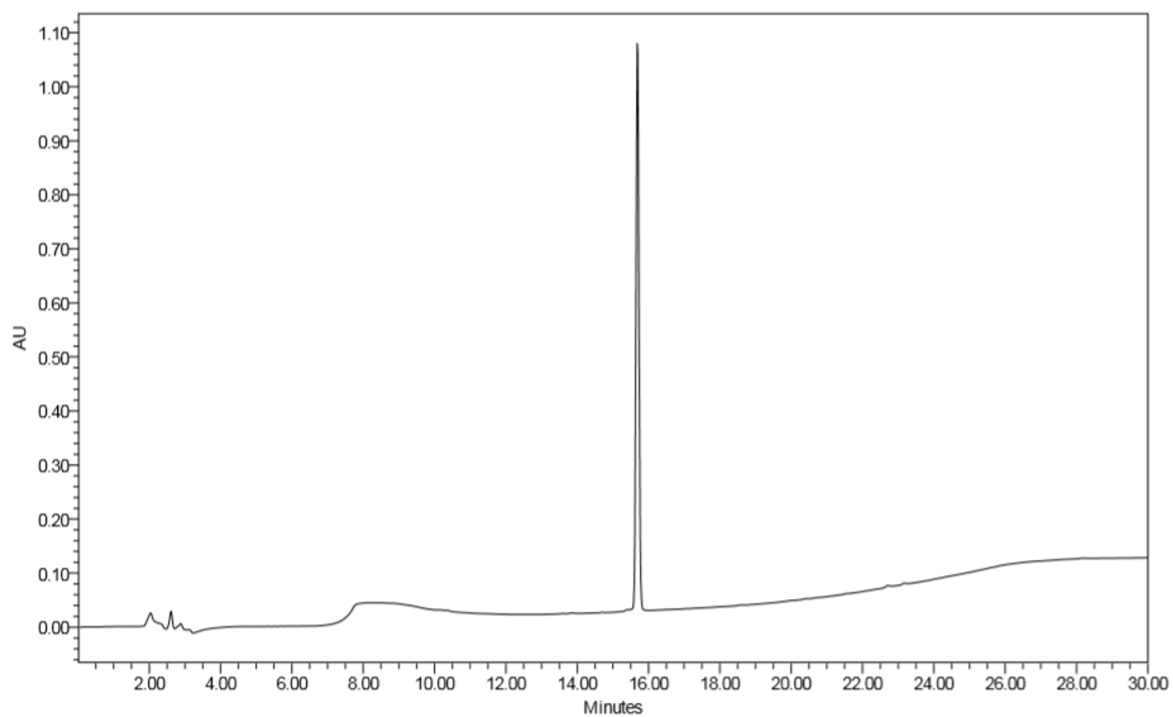

**[(C<sub>10</sub>)C5]BP214 (16)**

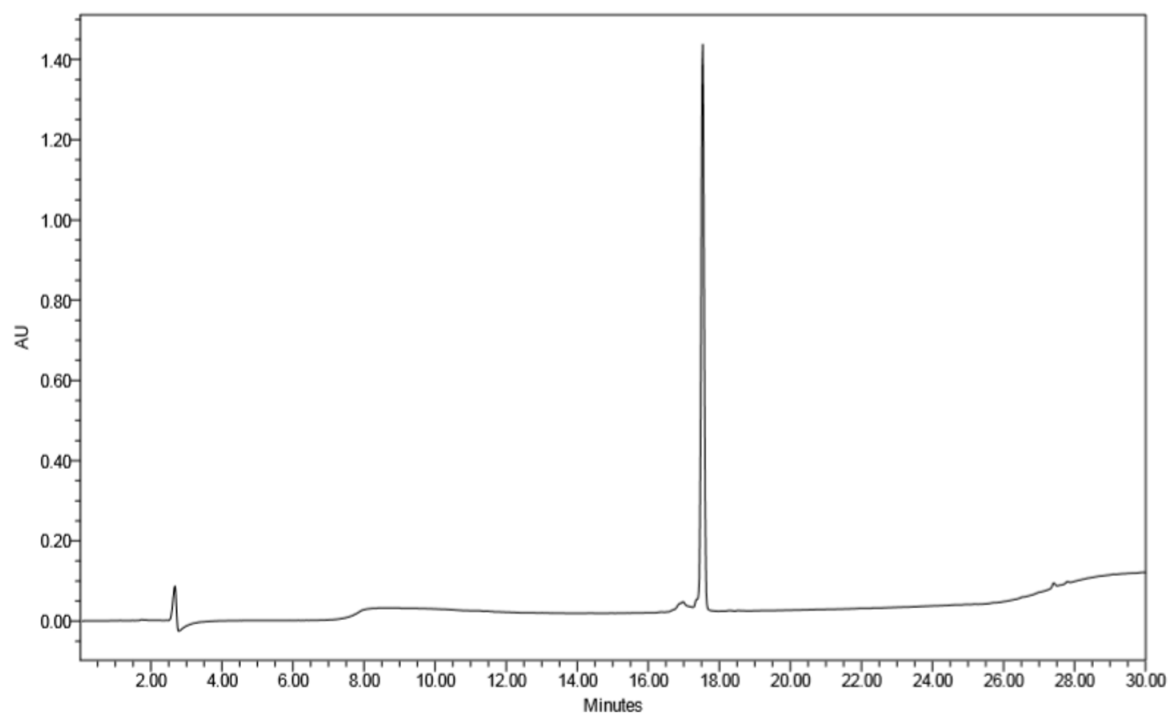

**[(C<sub>12</sub>)C5]BP214 (17)**

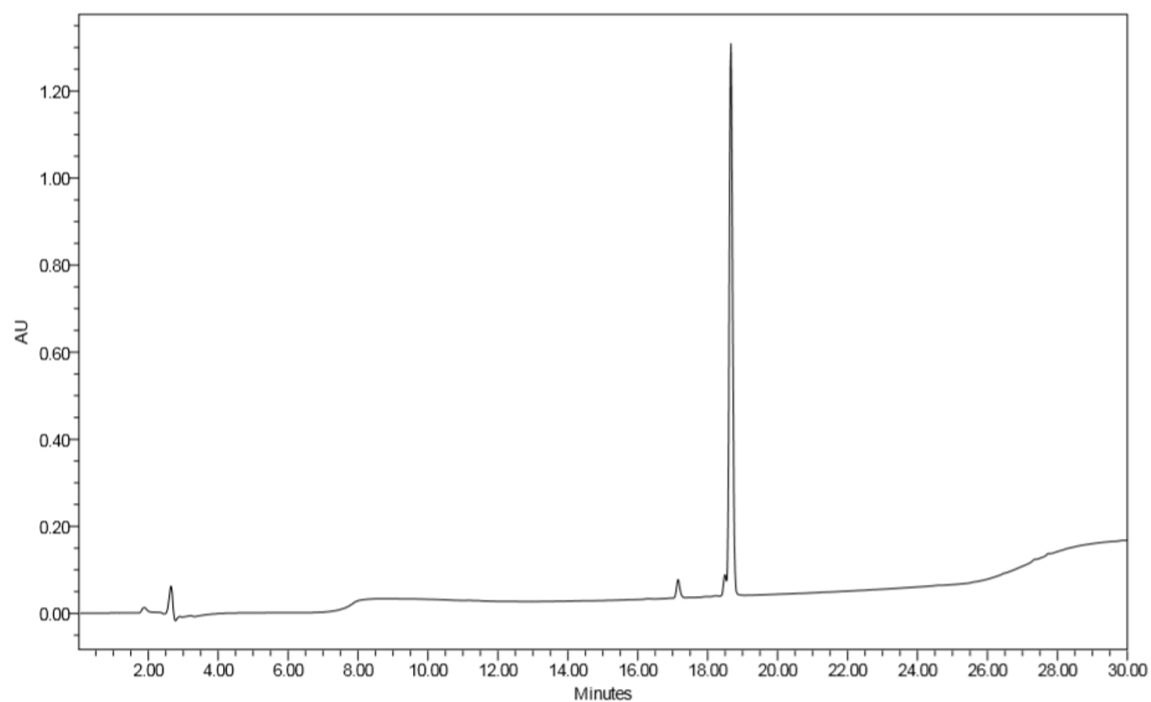

**[(C<sub>14</sub>)C5]BP214 (18)**

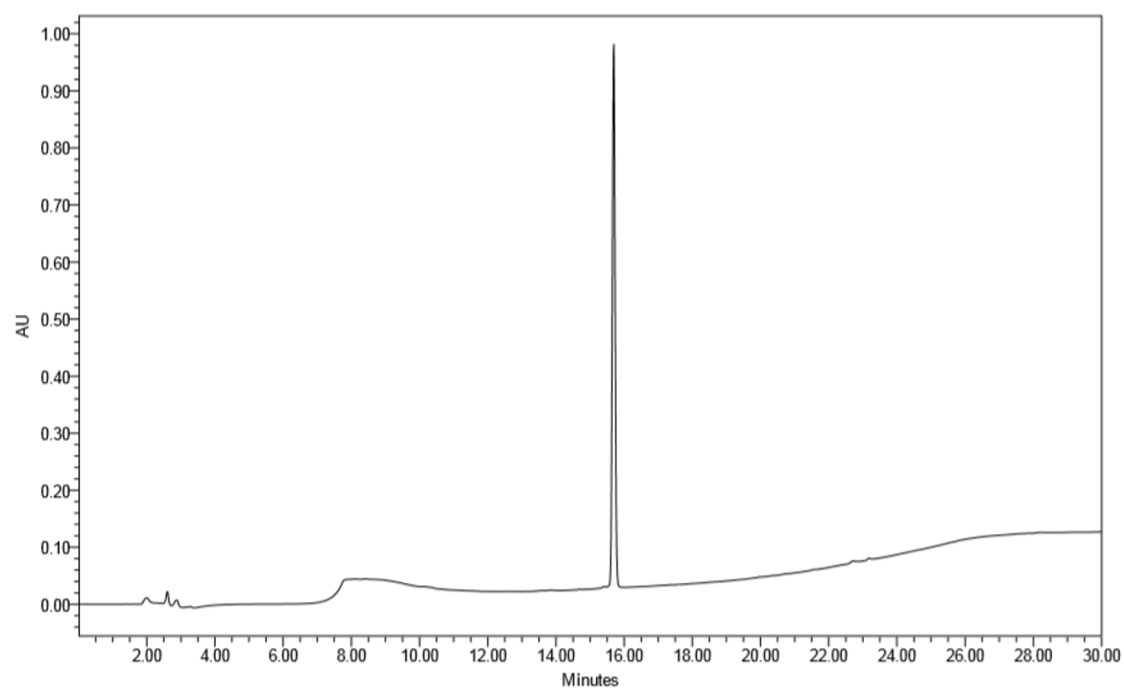

## SIV: MALDI-TOF-MS spectra

BP214

Mw = 1448.91 Da

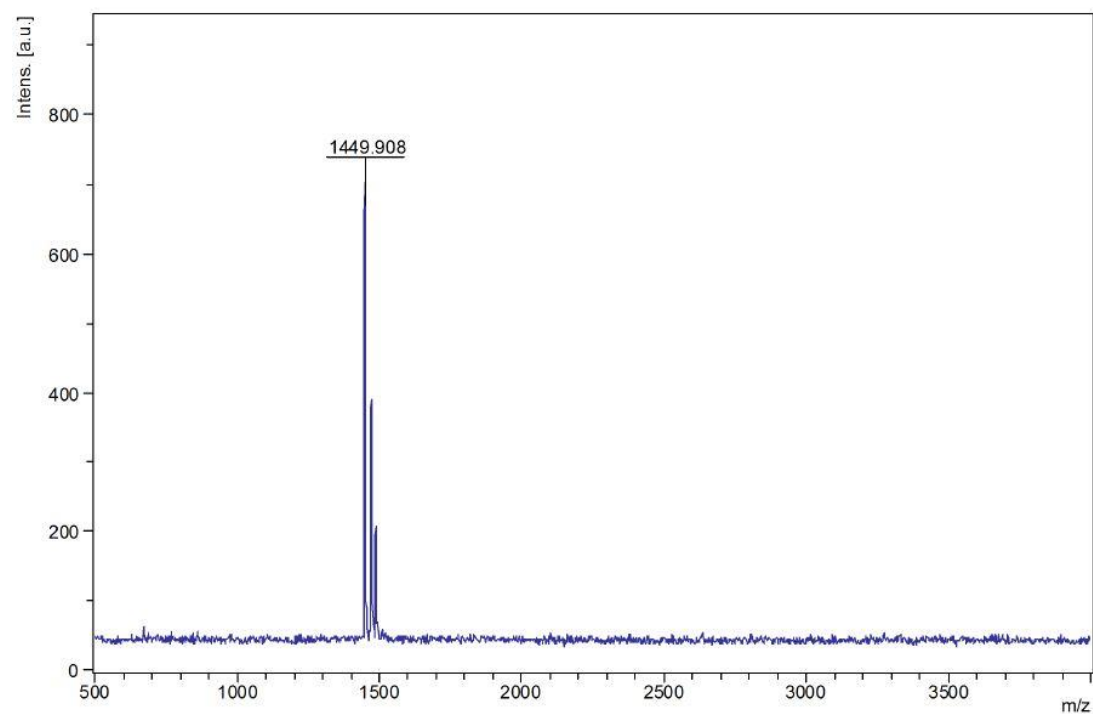

[C<sub>4</sub>]BP214 (1)

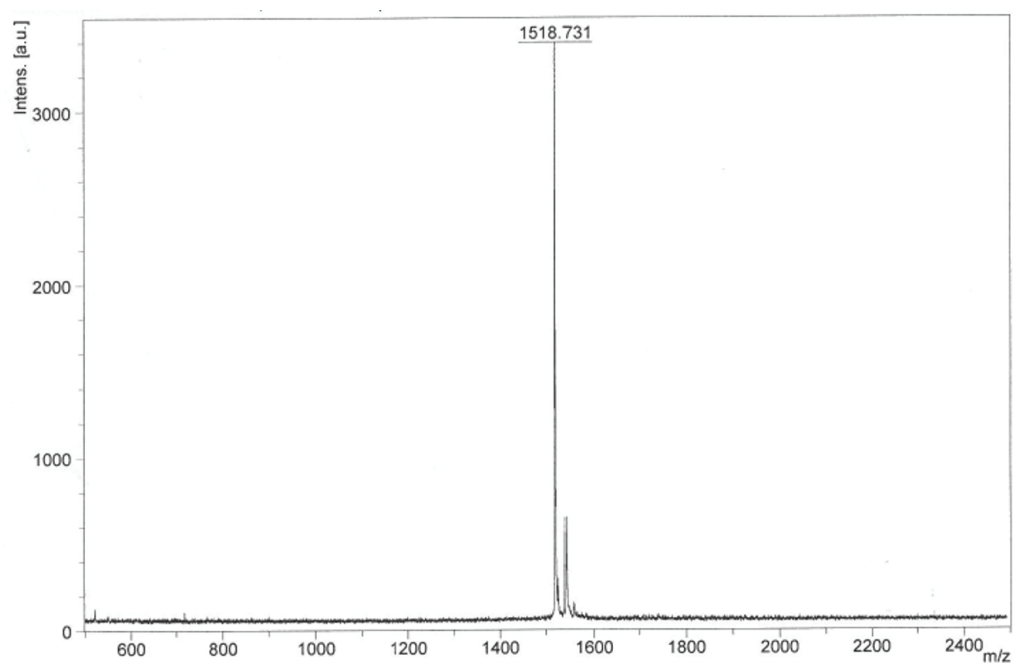



**[C<sub>6</sub>]BP214 (2)**

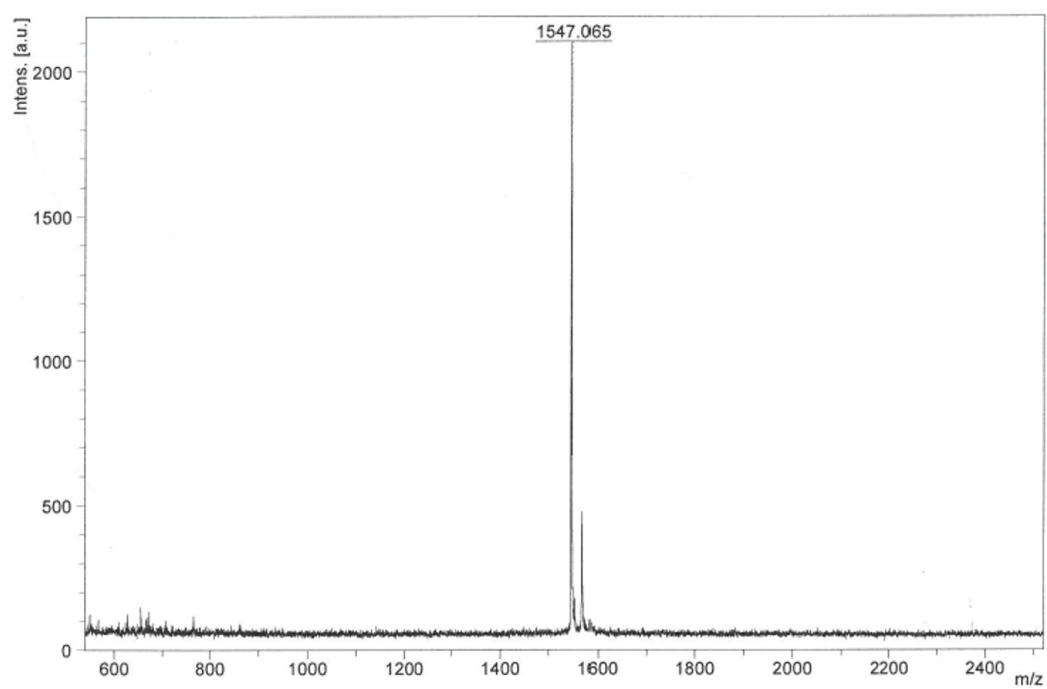

**[C<sub>8</sub>]BP214 (3)**

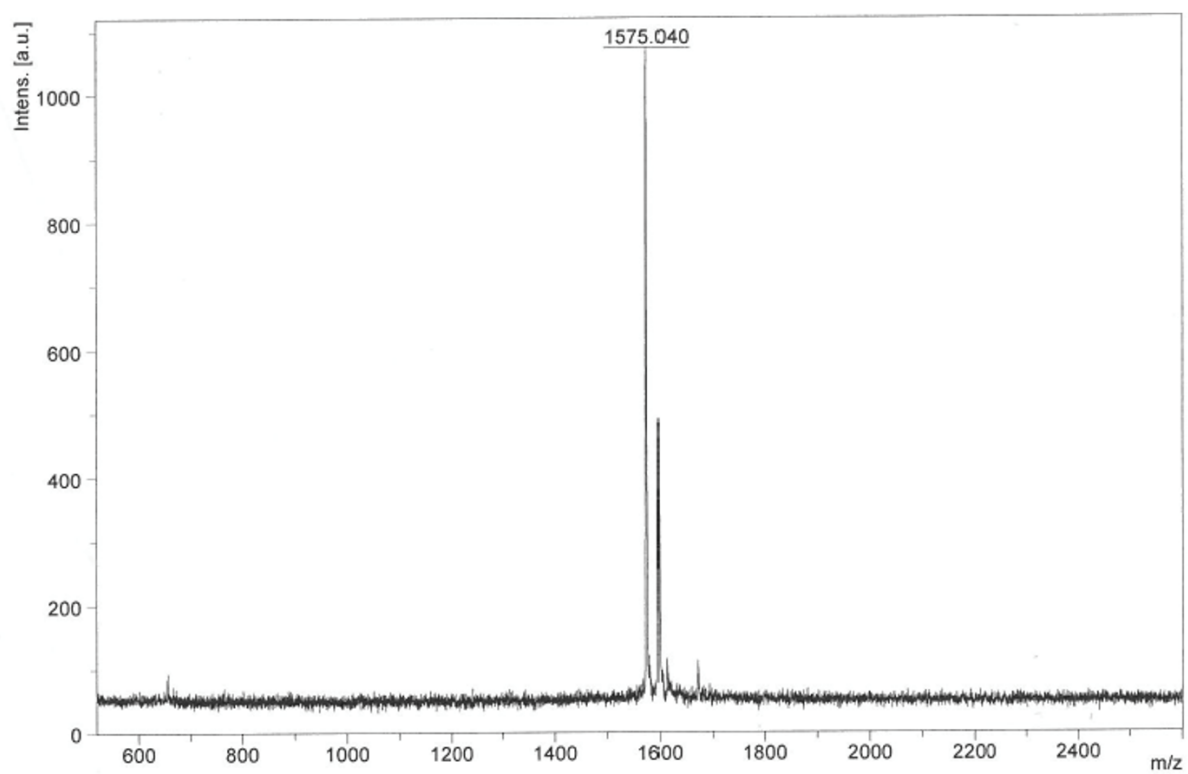

**[C<sub>10</sub>]BP214 (4)**

Mw = 1603.17 Da

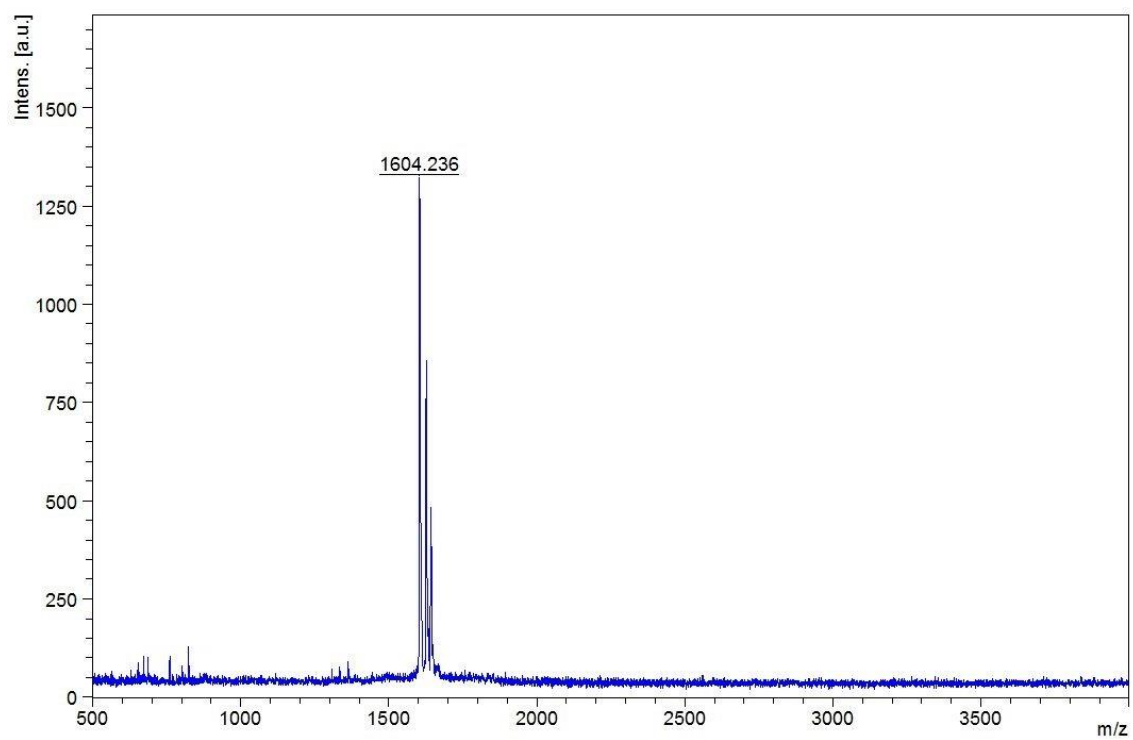

**[C<sub>12</sub>]BP214 (5)**

Mw = 1631.22 Da

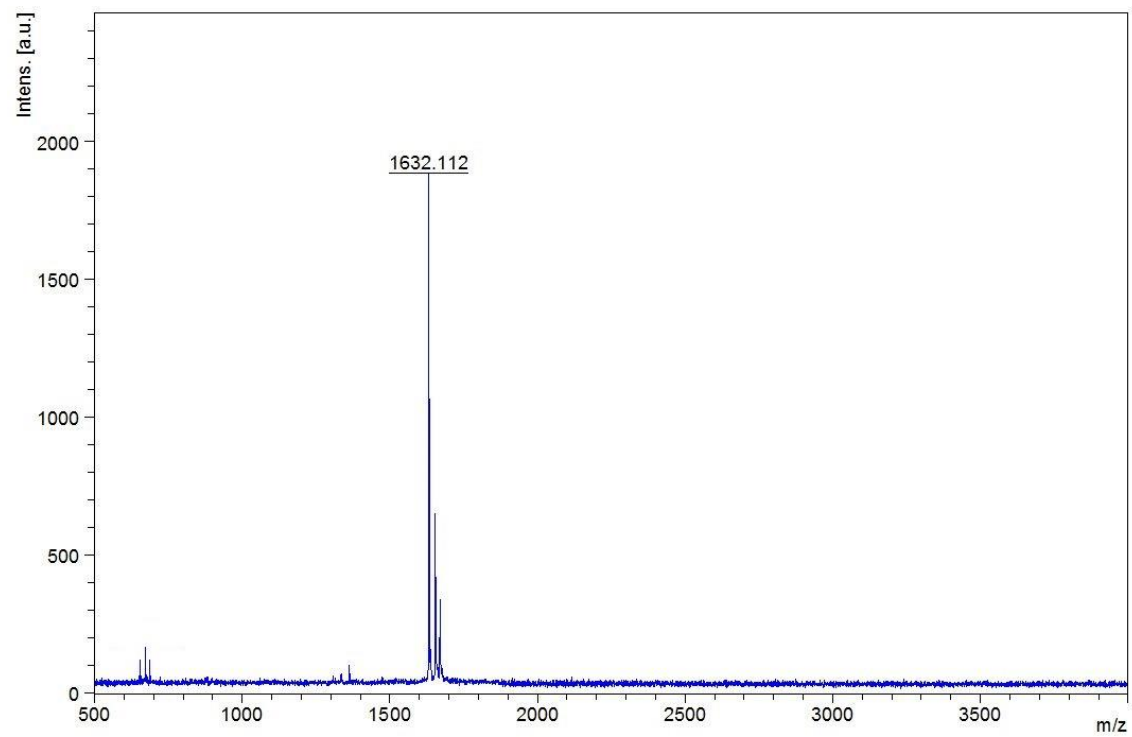

**[C<sub>14</sub>]BP214 (6)**

Mw = 1659.27 Da

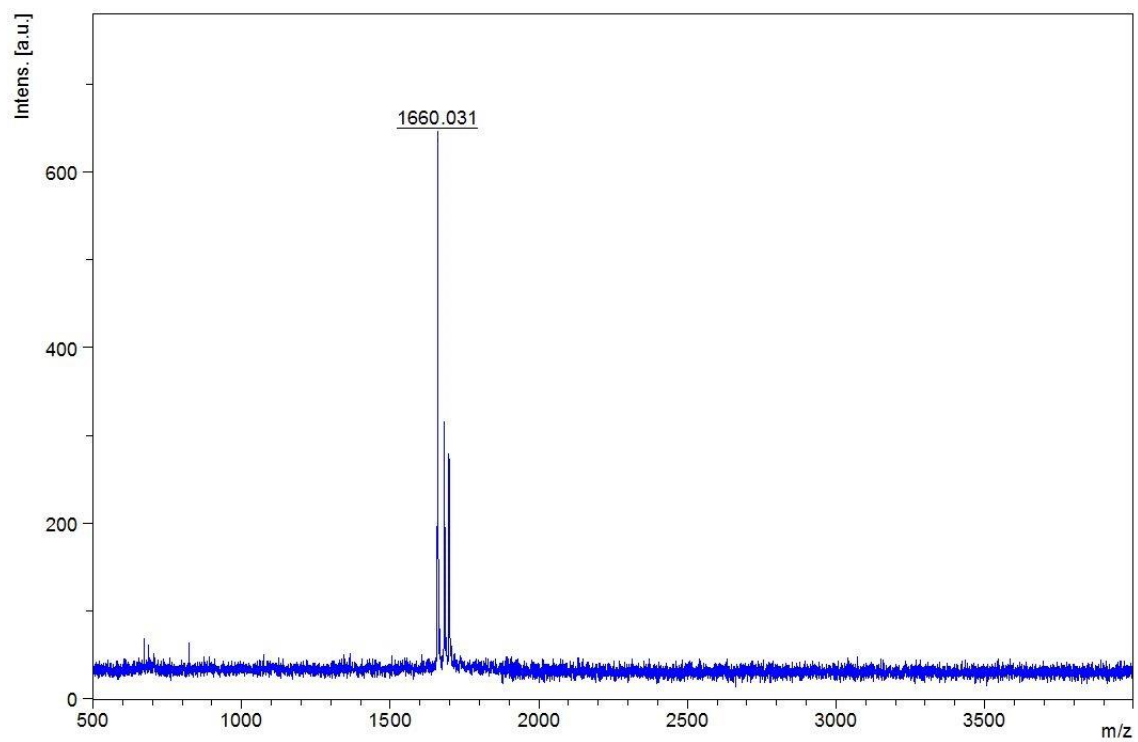

**[C<sub>3</sub>]BP214 (7)**

Mw = 1503.95 Da

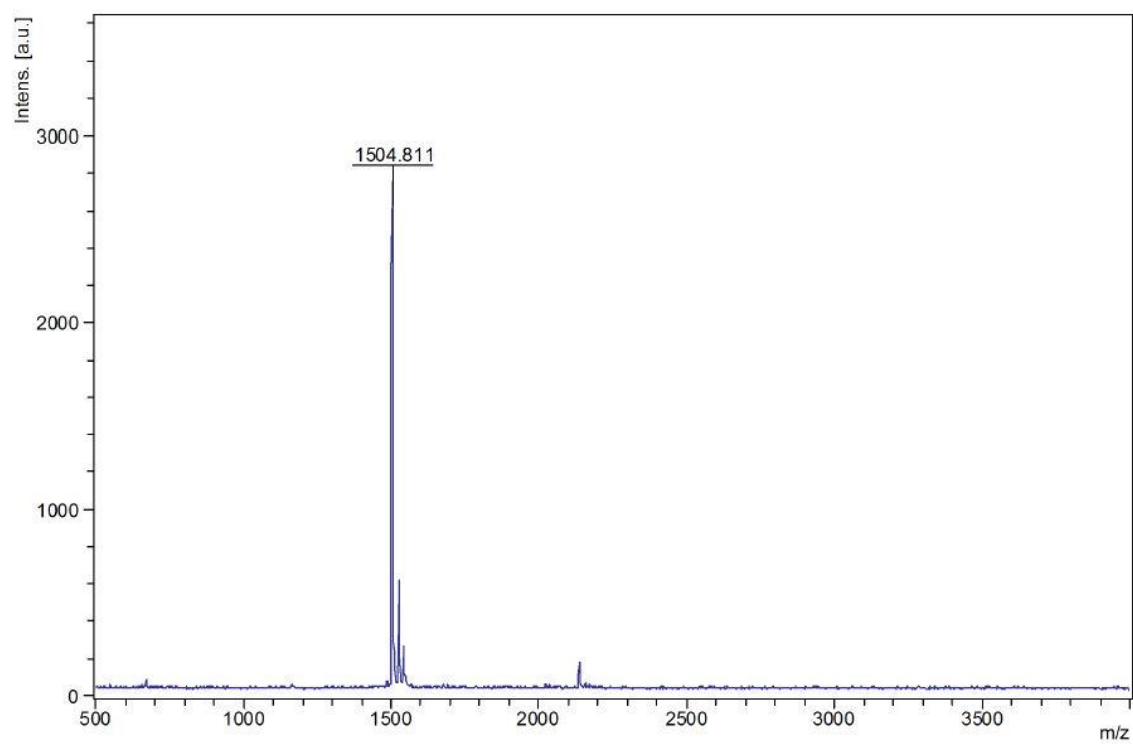

**[C4]BP214 (8)**

Mw = 1503.95 Da

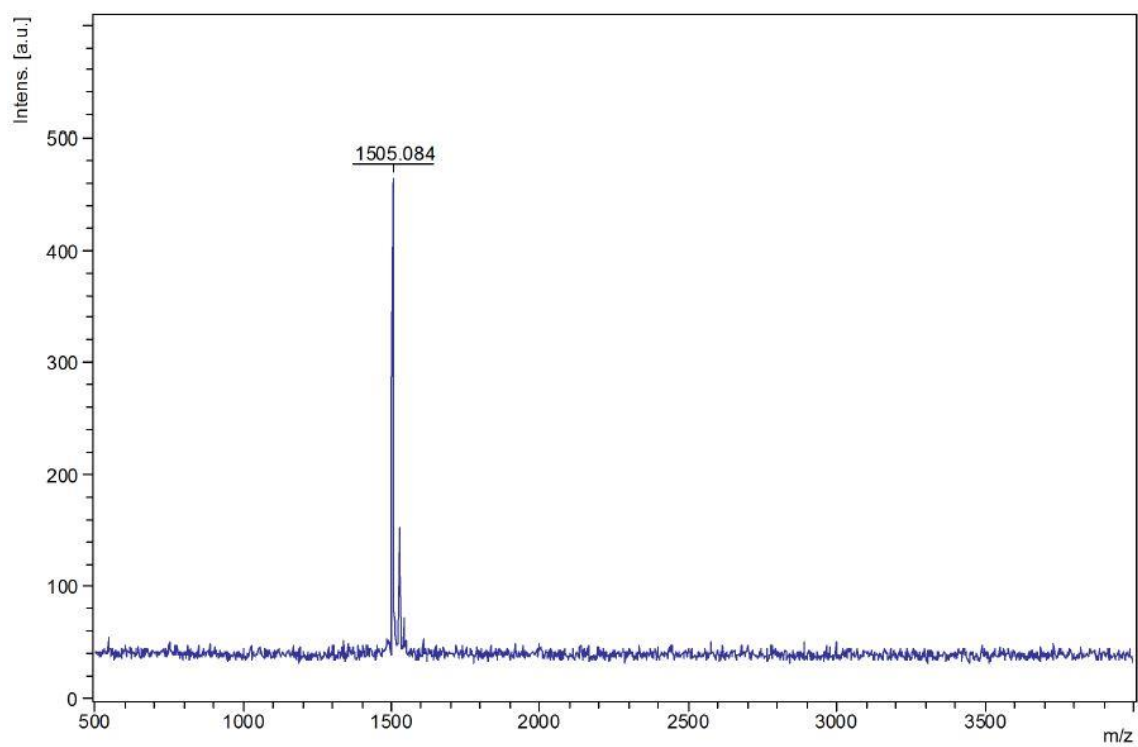

**[C5]BP214 (9)**

Mw = 1503.95 Da

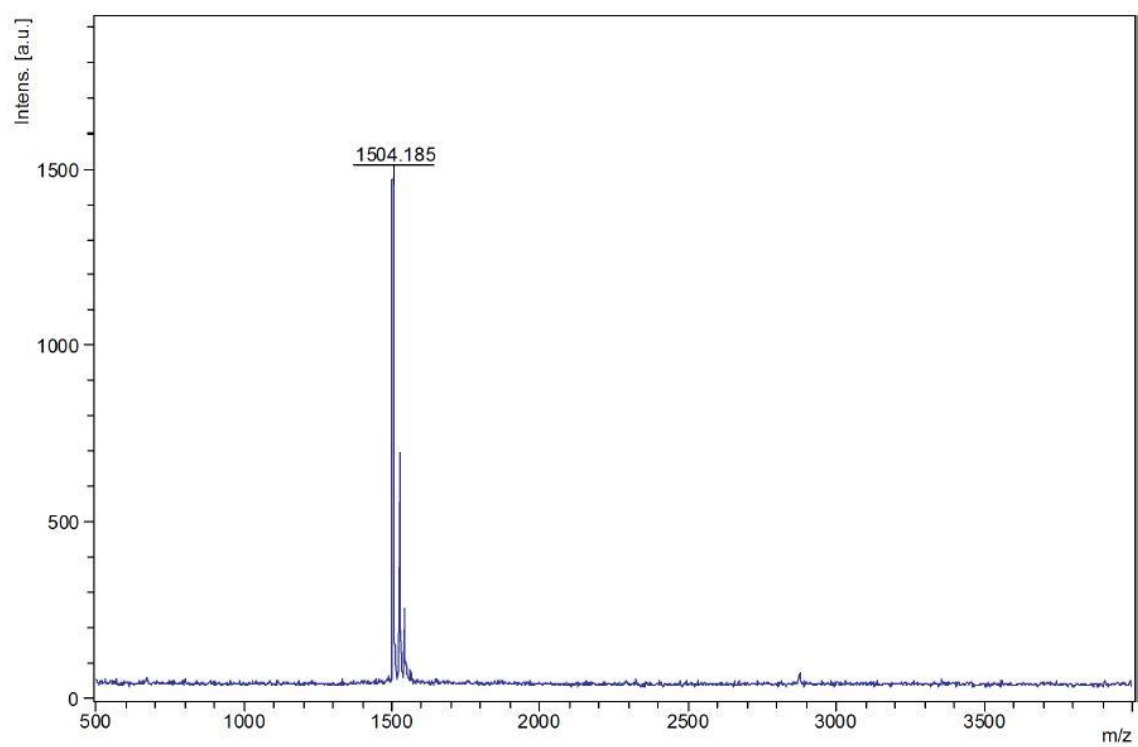

**$[(C_{10})C_3]BP214$  (10)**

Mw = 1658.20 Da

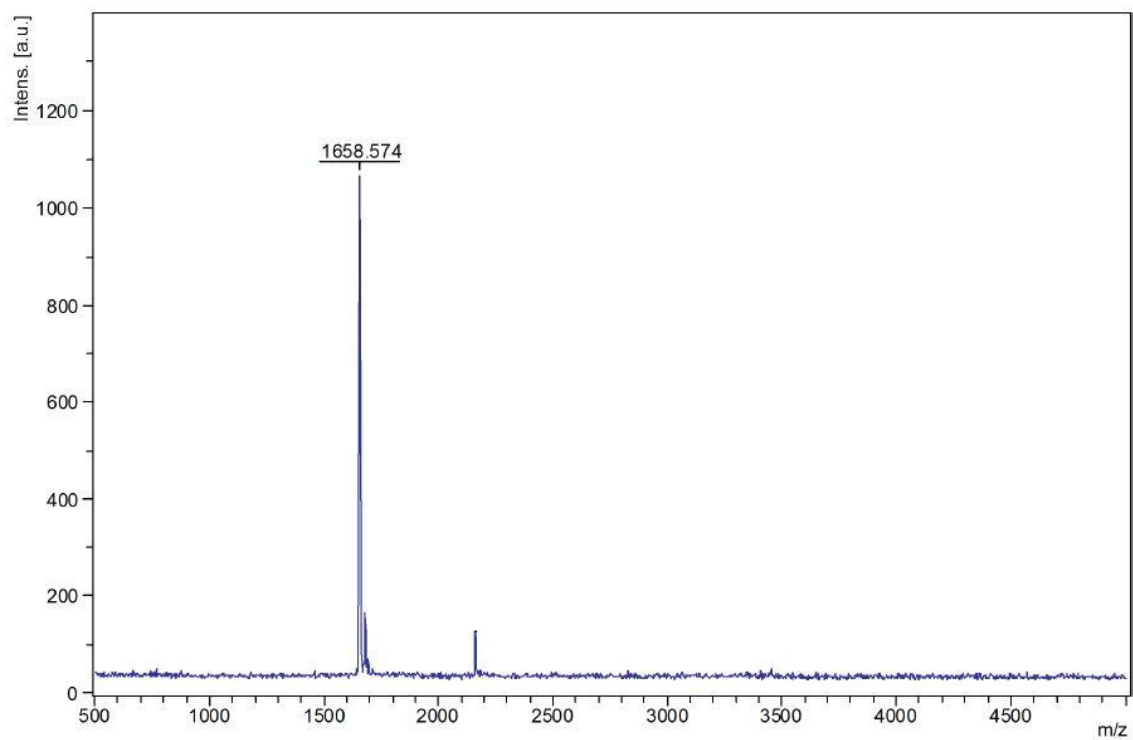

**$[(C_{12})C_3]BP214$  (11)**

Mw = 1686.26 Da

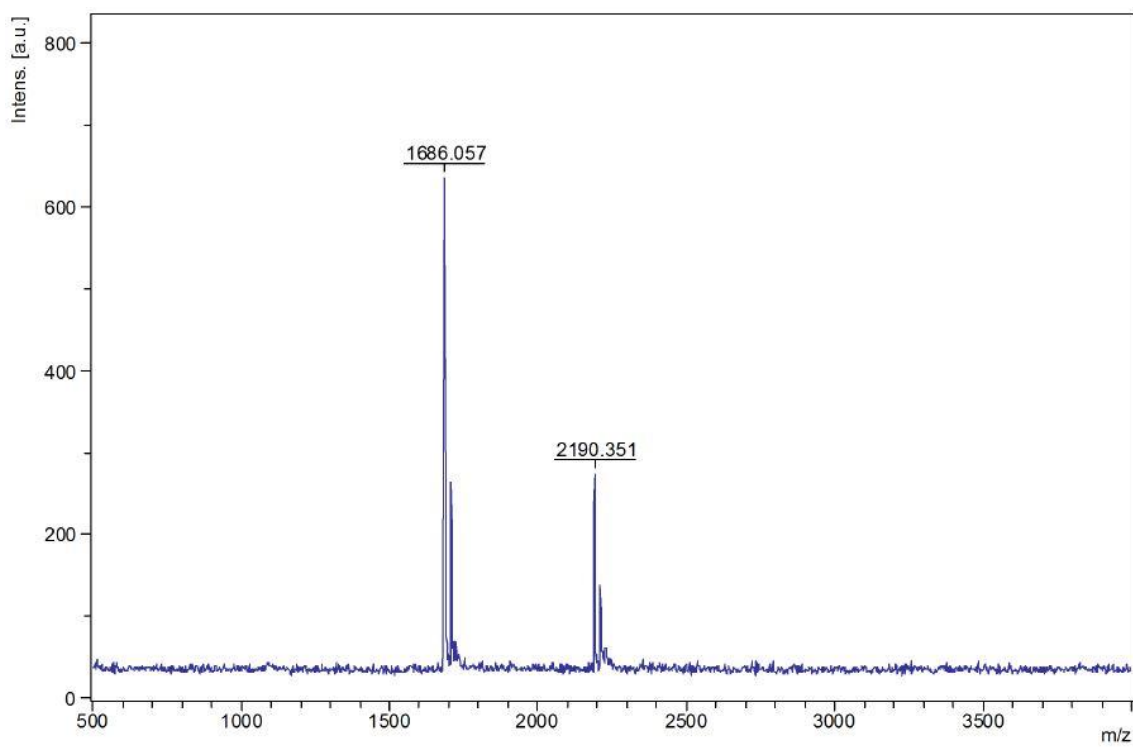

**$[(C_{14})C3]BP214$  (12)**

Mw = 1714.31 Da

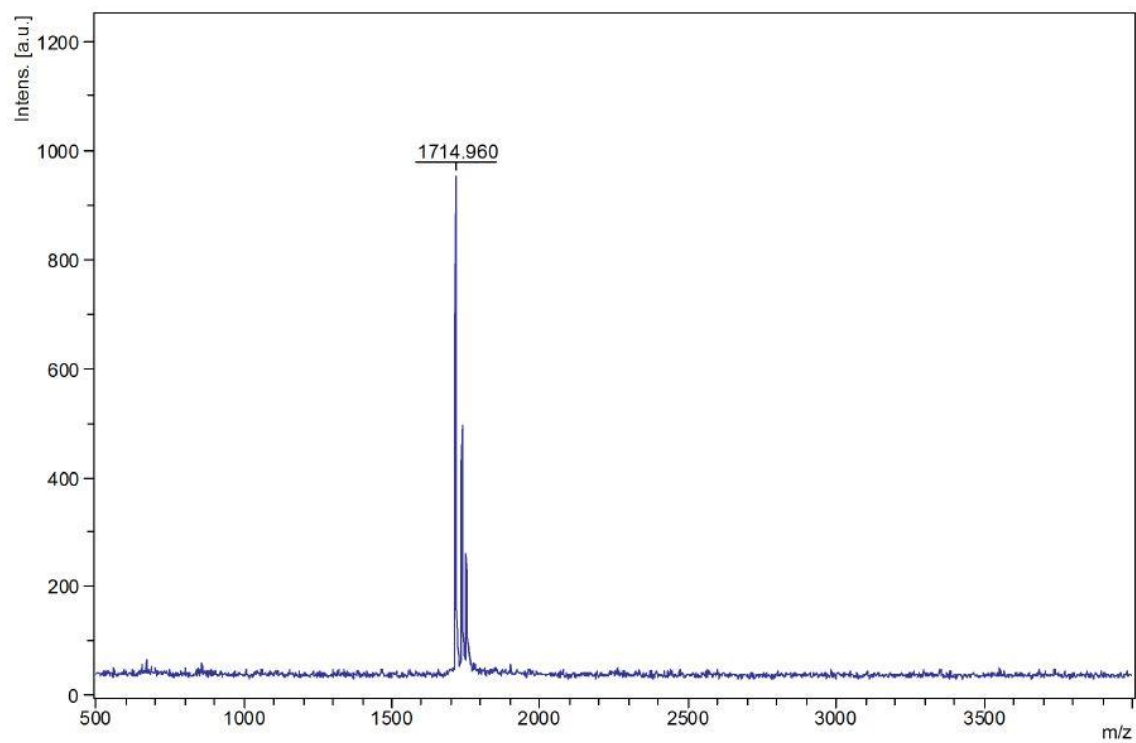

**$[(C_{10})C4]BP214$  (13)**

Mw = 1658.20 Da

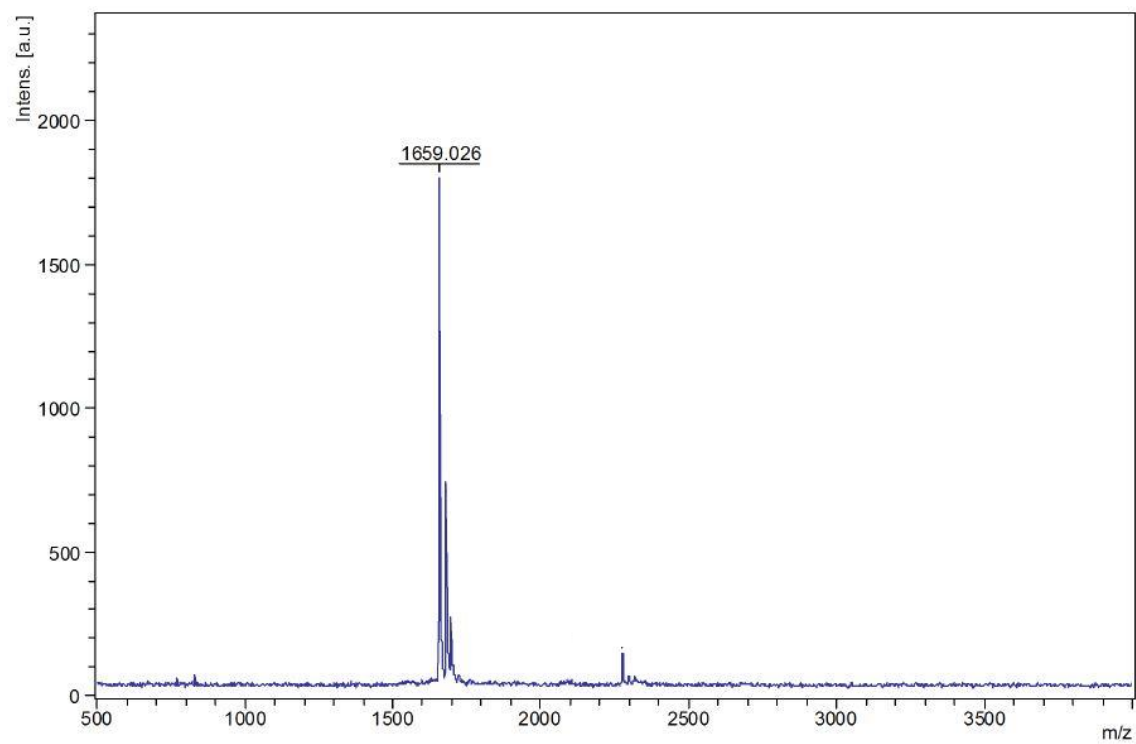

**$[(C_{12})C_4]BP214$  (14)**

Mw = 1686.26 Da

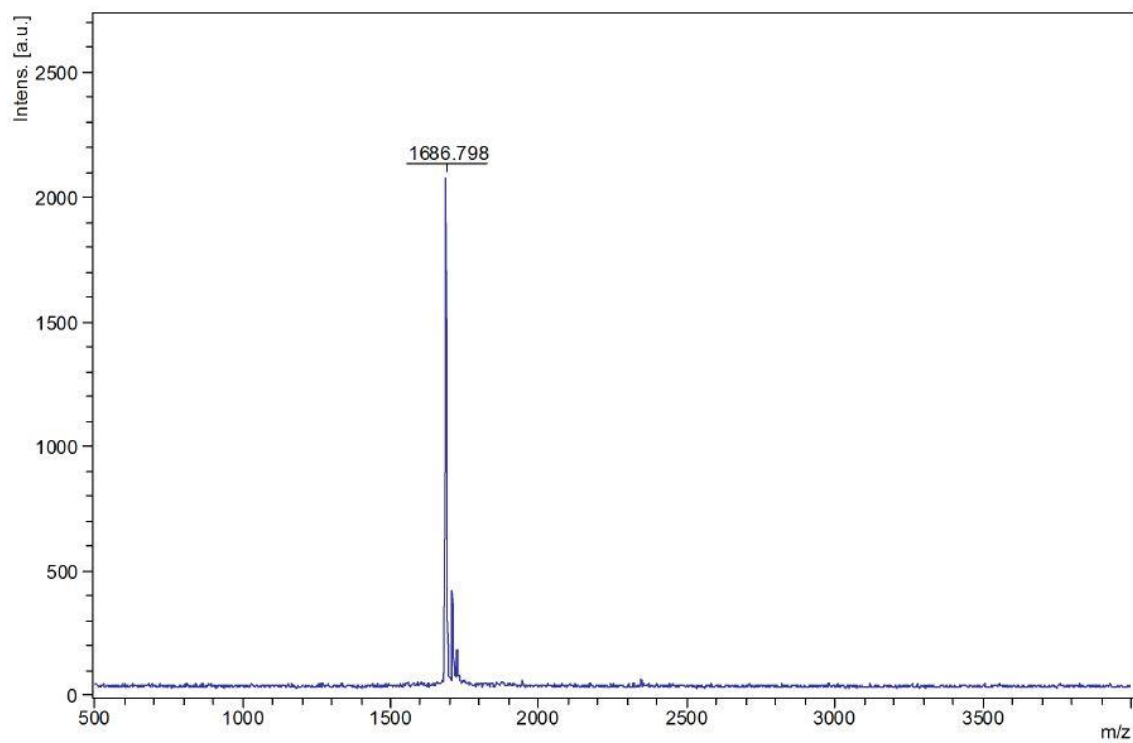

**$[(C_{14})C_4]BP214$  (15)**

Mw = 1714.31 Da

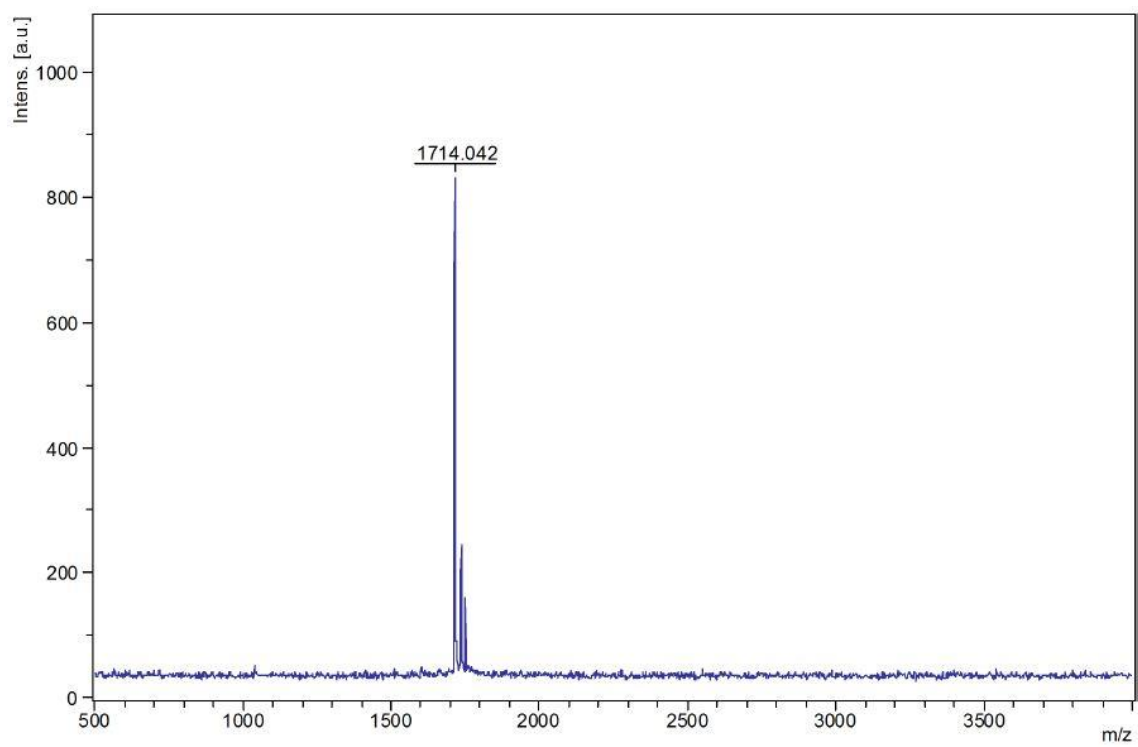

**$[(C_{10})C5]BP214$  (16)**

Mw = 1658.20 Da

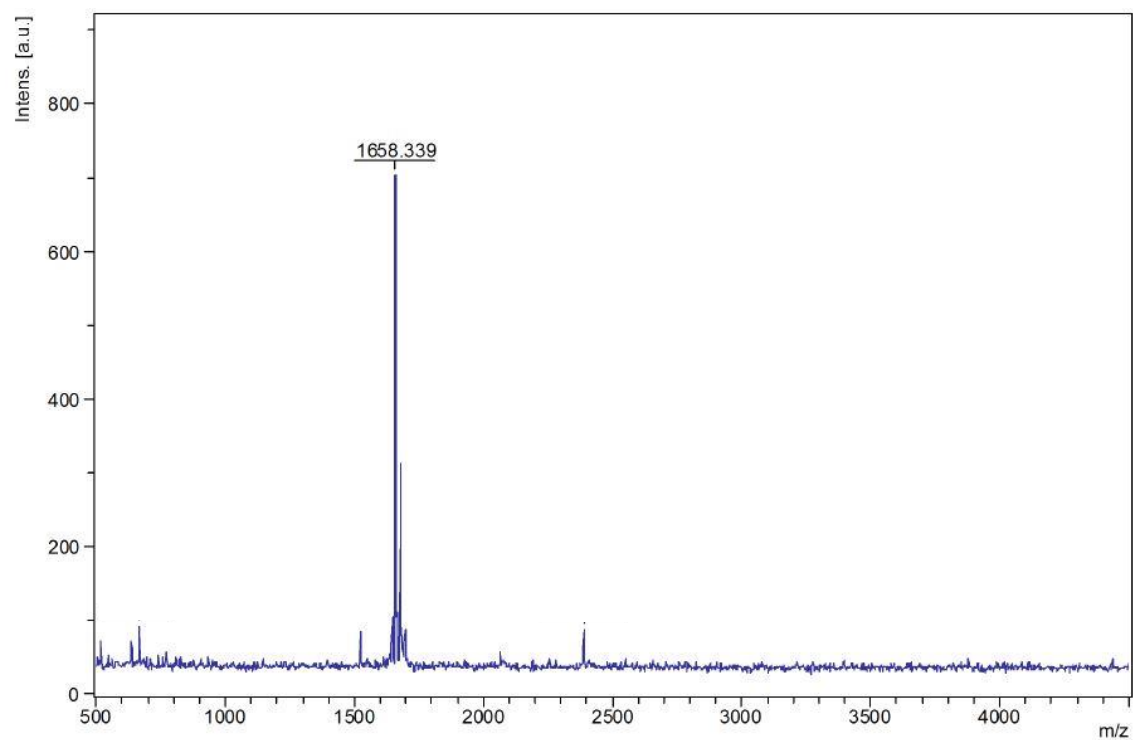

**$[(C_{12})C5]BP214$  (17)**

Mw = 1686.26 Da

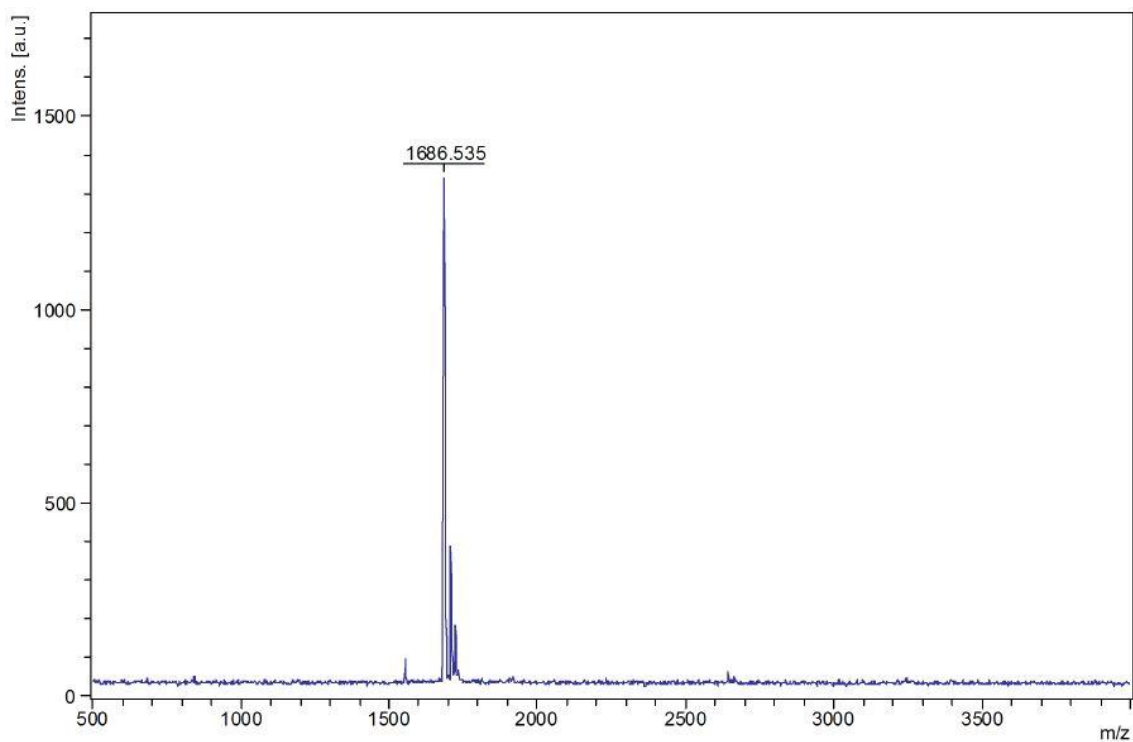



**[(C<sub>14</sub>)C<sub>5</sub>]BP214 (18)**

Mw = 1714.31 Da

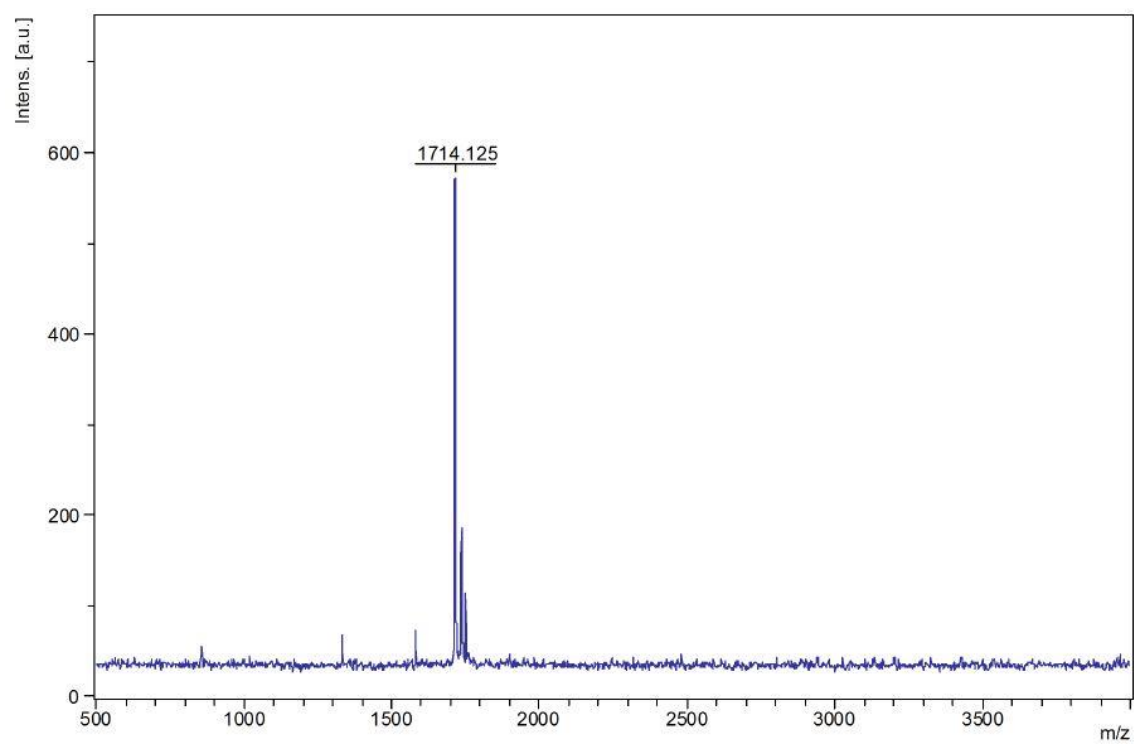

SV:

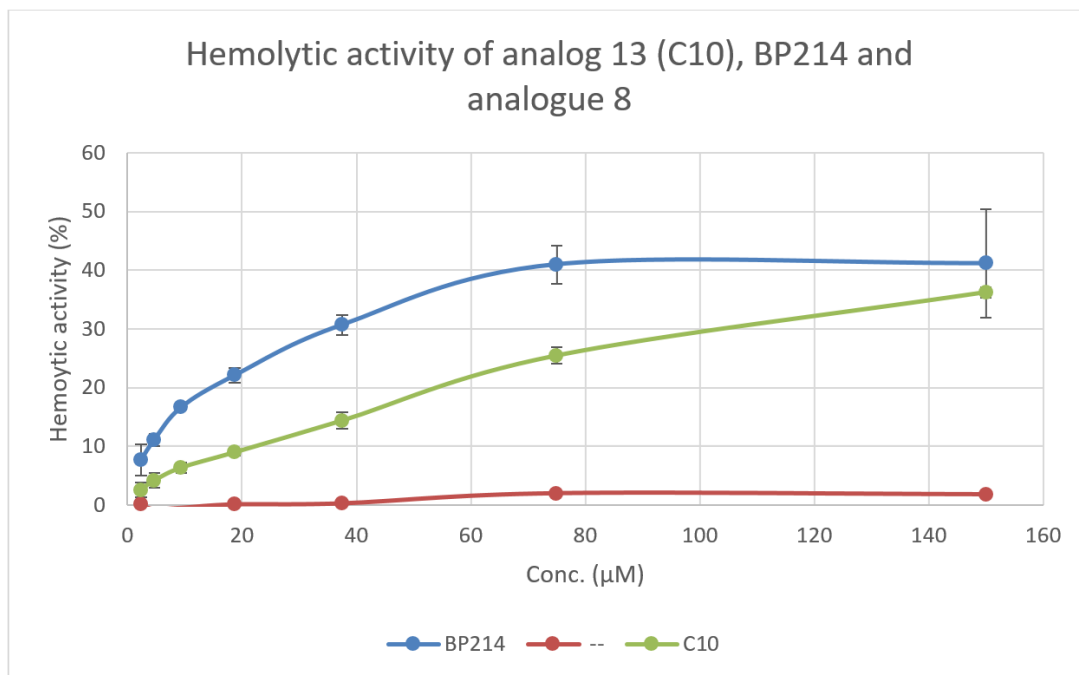

Supplement: s1 [file s1]
